1 **MNPmApp: An image analysis tool to quantify mononuclear phagocyte**  
2 **distribution in mucosal tissues<sup>a, b</sup>**

3 *Running title: Spatial distribution of mucosal MNPs*

4 Catherine Potts<sup>1#</sup>, Julia Schearer<sup>2#</sup>, Dominic Bair<sup>1</sup>, Becky Ayler<sup>3</sup>, Jordan Love<sup>1</sup>, Jennifer Dankoff<sup>2</sup>,  
5 Paul R. Harris<sup>4</sup>, Dominique Zosso<sup>1#</sup>, Diane Bimczok<sup>2\*\*</sup>

6 <sup>1</sup> Department of Mathematical Sciences, Montana State University, Bozeman, MT

7 <sup>2</sup> Department of Microbiology and Cell Biology, Montana State University, Bozeman, MT

8 <sup>3</sup> Park High School, Livingston, MT

9 <sup>4</sup> Division of Pediatrics, Department of Pediatric Gastroenterology and Nutrition, School of  
10 Medicine, Pontificia Universidad Católica de Chile, Santiago, Chile

11

12 #, \* These authors contributed equally.

13 \*Corresponding author:

14 Dr. Diane Bimczok

15 Department of Microbiology and Cell Biology

16 2155 Analysis Drive

17 Bozeman, MT, 59717

18 Email: [diane.bimczok@montana.edu](mailto:diane.bimczok@montana.edu)

19 Phone: +1-406-994-4928

20

21 <sup>a</sup> Funding was provided by NIH grants P30GM110732 (to D. Bimczok and D.Z.), U01EB029242

22 (to D. Bimczok) and P20GM103474 (to D. Bimczok, J.S. and D. Bair), the M.J. Murdock

23 Charitable Trust Partners in Science Program (to R.A), and the Simons Foundation collaboration

24 grant for mathematicians #586942 (to D.Z.).

25 <sup>b</sup> Select data were presented at *Applied Mathematics: The Next 50 Years*, University of  
26 Washington, June 2019 (C. Potts), the *Workshop on Recent Developments on*  
27 *Mathematical/Statistical Approaches in Data Science*, University of Texas, May 2019 (C. Potts  
28 and J. Love), the *Data Science and Image Analysis Conference of the Pacific Northwest*,  
29 Washington State University, March 2020 (D. Bair), and the *SIAM Northern States Section*  
30 *Student Chapter*, Utah State University, October 2020 (D. Bair).

31

32 **Abstract:**

33 Mononuclear phagocytes (MNPs) such as dendritic cells and macrophages perform key  
34 sentinel functions in mucosal tissues and are responsible for inducing and maintaining adaptive  
35 immune responses to mucosal pathogens. Positioning of MNPs at the mucosal epithelial  
36 interface facilitates their access to lumenally-derived antigens and may regulate MNP function  
37 through soluble mediators or surface receptor interactions. Therefore, accurately quantifying the  
38 distribution of MNPs within mucosal tissues as well as their spatial relationship with other cells is  
39 important to infer functional cellular interactions in health and disease. In this study, we  
40 developed and validated a MATLAB-based tissue cytometry platform, termed “MNP mapping  
41 application” (MNPmApp), that performs high throughput analyses of MNP density and distribution  
42 in the gastrointestinal mucosa based on digital multicolor fluorescence microscopy images and  
43 that integrates a Monte Carlo modeling feature to assess randomness of MNP distribution.  
44 MNPmApp identified MNPs in tissue sections of the human gastric mucosa with a specificity of  
45  $98.3 \pm 1.6\%$  and a sensitivity of  $76.4 \pm 15.1\%$ . Monte Carlo modeling revealed that mean MNP-  
46 MNP distances were significantly lower than anticipated based on random cell placement,  
47 whereas MNP-epithelial distances did not significantly differ from those of randomly placed cells.  
48 Interestingly, *H. pylori* infection had no significant impact on MNP density or distribution with  
49 regards to MNP-epithelial distances or MNP-MNP distances in gastric tissue. Overall, our  
50 analysis demonstrates that MNPmApp is a useful tool for unbiased quantitation of MNPs and  
51 their distribution at mucosal sites.

52

53 **Key Terms:**

54 Dendritic cells; macrophages; gastric mucosa; microscopy, fluorescence; epithelium; cell count;  
55 software; *Helicobacter pylori*; image analysis; tissue cytometry; Monte Carlo method

56 **Introduction:**

57 Immune cell interactions with their tissue environment can shape immune function and  
58 responses to infection and injury. Mononuclear phagocytes (MNP) consist of blood monocytes  
59 and tissue-resident dendritic cells (DCs) and macrophages that play key roles as sentinel and  
60 antigen presenting cells (1). In previous studies on MNPs in the gastrointestinal mucosa, we and  
61 others have demonstrated that MNPs respond to environmental cues from both mucosal  
62 epithelial cells and stromal cells and that microenvironmental conditioning defines MNP function  
63 (2-6). Quantifying local cellular interactions between MNPs and other cells within the tissues is  
64 important to fully understand these functional immune networks in health and disease.

65 Microscopic images of tissues provide crucial information on immune cell density and  
66 distribution. Automated quantitative analysis of immunofluorescently labeled histological images,  
67 also termed tissue cytometry, enables unbiased high-throughput processing of digital imaging  
68 data (7). Multiple image analysis software packages from commercial and non-commercial  
69 sources such as MetaMorph (Molecular Devices), Imaris (Bitplane), CellProfiler and  
70 Bioconductor (8,9) now include modules for automated cell identification. These programs  
71 commonly use cellular or nuclear segmentation, i.e., the recognition of connected pixels in binary  
72 images obtained from thresholding, to identify individual cells (7,10). However, MNPs have an  
73 irregular shape with long dendrites and discontinuous staining on routine histological sections,  
74 which makes automated identification of individual cells highly challenging (11). Moreover, only  
75 few tools are available that have sought to automate quantitative analysis of cell positioning or  
76 that have incorporated tools to assess to what extent observed cell distribution can be  
77 considered random.

78 Here, we have developed a MATLAB-based tissue cytometry application, termed  
79 **MonoNuclear Phagocyte mapping Application** (MNPmApp), to perform three important image  
80 analysis tasks: (I) Identification of MNPs in mucosal tissue sections based on cell surface

81 staining; (II) measurement of MNP-epithelial and MNP-MNP distances to assess cell-cell  
82 interactions; and (III) Monte Carlo modeling to determine randomness or specificity of cellular  
83 distribution within the tissue (12,13). Functional interactions between cells within a tissue involve  
84 specific molecular mechanisms that are non-random. To quantitatively determine the specificity  
85 or randomness of cell interactions on microscopic images, various test statistics such as pairwise  
86 inter-cell distances and cell-to-epithelium distances have previously been used. Händel et al.  
87 (14) developed an equation that assumes up to six potential contacts between a cell of interest  
88 and surrounding cells to predict the expected distribution of two cell types within a tissue. When  
89 irregular tissue geometries such as the gastric lamina propria need to be considered, this  
90 analytic approach becomes prohibitively complex. Therefore, we included a Monte Carlo  
91 modeling feature to compute randomized cell patterns that are compared to the observed cell  
92 patterns in our image analysis approach.

93         Using MNPmApp to analyze a tissue microarray with sections from healthy and *H. pylori*-  
94 infected adults, we here demonstrate that, interestingly, observed MNP-epithelial interactions  
95 were not significantly different from a randomized distribution, which suggests that non-epithelial  
96 cues as well as tissue geometry may control MNP distribution in the human gastric mucosa.  
97 However, mean MNP-MNP distances were significantly lower than expected, consistent with  
98 MNP cluster formation. Surprisingly, presence or absence of *H. pylori* infection did not  
99 significantly alter MNP density or distribution in the tissues. Overall, our analyses demonstrate  
100 MNPmApp is a valuable tool for automated, unbiased high throughput analysis of MNP density  
101 and distribution in immunofluorescently labeled mucosal tissue sections.

102

103

104 **Materials and Methods:**

105 Tissue samples:

106 Endoscopic gastric biopsies (corpus region) were obtained with local IRB approval from  
107 25 adult and 120 juvenile subjects with abdominal symptoms residing in Santiago, Chile, as  
108 previously described (3). Exclusion criteria included (a) use of antibiotics, antacid, H2-blocker,  
109 proton-pump inhibitor, bismuth compound, non-steroidal anti-inflammatory drug or  
110 immunosuppressive agent during the two weeks prior to endoscopy; and (b) stool examination  
111 positive for ova or parasites. *H. pylori* status was determined by rapid urease test and  
112 microscopic evaluation, and a study subject was judged colonized with *H. pylori* if one or both  
113 tests were positive for the bacteria. Biopsies were formalin-fixed and then paraffin-embedded  
114 into a tissue microarray. Only samples from 19 adult patients with well-preserved tissue  
115 morphology were considered for our analyses.

116

117 Immunohistochemical staining protocol:

118 To label MNPs and epithelial cells using immunofluorescence, slides were deparaffinized  
119 and rehydrated using 5 min washes in differently concentrated ethanol. We then performed heat-  
120 induced epitope retrieval in a rice steamer with Dako Target Retrieval Solution (DakoCytomation,  
121 Santa Clara, CA) at 98°C for 25 min. Slides were then washed with running distilled water until  
122 all unmasking solution had been replaced. Following blocking with a commercial blocking  
123 solution, slides were rinsed with PBS-0.05% Tween-20 solution and then incubated with primary  
124 antibodies for HLA-DR to label MNPs (Abcam, Cambridge, UK; ab 166777, mouse anti-human  
125 IgG2b, clone LN-3) and anti-pan keratin to label epithelial cells (Cell Signaling Technology,  
126 Danvers, MA; #4545, mouse anti-human IgG1 clone C11) in a humidity chamber for at least 2 h.  
127 After washing slides, secondary antibodies (Southern Biotechnologies, Birmingham, AL) were  
128 added for 30 min (HLA-DR: goat anti mouse IgG2b Alexa 488; cytokeratin: goat anti mouse IgG1

129 biotin followed by streptavidin PE). Cell nuclei were labelled with DAPI (4',6-diamidino-2-  
130 phenylindole). A control slide was processed by labeling with secondary antibodies only to  
131 assess background fluorescence. The slides were washed and cover-slipped with Fluoroshield  
132 histology mounting medium (Abcam) and sealed with nail varnish prior to microscopic analysis.

133

#### 134 Microscopy:

135 Images were acquired at 20x objective magnification on a Nikon Eclipse T2000-U  
136 microscope equipped with a CoolSnap ES digital camera and NIS Elements BR2.30 software  
137 (Nikon, Tokyo, Japan). All image analyses were performed using the same set of digital images  
138 (n=57) obtained from the 19 adult tissue samples from the tissue microarray described above.  
139 Image files were saved as 16 bit \*.tif files. Regions of interest (ROIs) consisting of the gastric  
140 lamina propria were traced using the selection brush tool in ImageJ (15), version 1.53c and were  
141 saved as \*.csv files. Borders between the selected lamina propria regions and the epithelium  
142 correspond to the epithelial basement membrane that separates lamina propria and epithelium.

143

#### 144 MNPmApp design in MATLAB:

145 The MNPmApp was designed in MATLAB (MathWorks Inc., Natick, MA). MNPmApp uses  
146 image processing techniques to identify immunofluorescently labeled MNPs in digital histology  
147 images based on the presence of the fluorescent MNP label in the region surrounding a  
148 fluorescently labeled cell nucleus. To perform this analysis, first we localized putative nuclear  
149 centers by convolving the cell nuclei channel with a pre-tuned Difference of Gaussian (DoG)  
150 filter. This template matching filter resulted in a processed image with strong positive responses  
151 where stained objects of the expected nuclear size, based on two DoG filters set to a standard  
152 deviation of 5 and 6 pixels, were present in the DAPI channel. Next, we applied MATLAB's

153 "imregionalmax" function to this DoG-filtered image, which identified local maxima, indicating  
154 likely centers of nuclei. While this process robustly located the nuclear centers, it also found  
155 maxima outside of the ROI and spurious low intensity local maxima due to DAPI background  
156 noise. Therefore, the local maxima were further filtered, first using the selected ROI. Second,  
157 spurious false positives were removed by filtering the remaining candidate locations using the  
158 original cell nuclei channel so that only local maxima with sufficiently strong DAPI signal and  
159 template match were retained. Thus, a local maximum of the nuclear detection process was  
160 rejected as nucleus location if the DAPI signal at that pixel was below half the median DAPI  
161 signal in the image (insufficient signal strength) or if the nuclear detection signal was below 5%  
162 of the median DAPI signal in the image (insufficient shape match). The resulting list of maxima  
163 was then used as the presumed centers of the nuclei contained inside the ROI.

164 After the nuclei centers were isolated, the MNPmApp determined which of the nuclei  
165 centers were likely associated with MNPs. Association was presumed if an "MNP" signal above  
166 the defined threshold level was found in a specified area (defined by the disk size) around a  
167 nucleus location. To this end, we integrated the MNP channel around the location of each  
168 nuclear center giving a measure of how much MNP signal was near each nucleus. We did this by  
169 convolving the MNP channel with a binary disk of user-specified size, which related to the  
170 expected spatial extent of one MNP. Finally, using the user's chosen thresholding parameter, we  
171 classified the nuclear centers as MNPs if the disk-convolved MNP signal locally surpassed the  
172 threshold. The end result was an x-y coordinate table of the locations of classified MNP nuclei  
173 indicating how many MNPs were found within the ROI.

174

175 *MNPmApp distance measurements and Monte-Carlo simulations:*

176 Based on the pixel coordinates of the identified MNPs, and the ROI delineation of the  
177 epithelium, the app then proceeded to compute distances: the Euclidean distance between each



178 MNP and the closest pixel of the epithelial boundary (MNP-EP), as well as the distance between  
179 each MNP and its closest peer (MNP-MNP). The app also reports the minimum, maximum and  
180 mean for both distances within one image, as well as histograms that show data distribution. For  
181 statistical comparison, i.e., to rule out complete spatial randomness, the app then repeatedly  
182 creates artificial MNP placements by randomly sampling uniformly (without replacement) an  
183 equal amount of points within the ROI, generating 1,000 randomized data sets for each image.  
184 MNP-epithelium and MNP-MNP distances are then computed for each of these random  
185 datasets. Statistics and histograms of these Monte-Carlo-simulated background distributions are  
186 provided as output for further statistical analysis.

187

#### 188 Image processing with MNPmApp:

189 The MNPmApp is available on GitHub (<https://github.com/dzosso/Spatial-Stats-App>). To  
190 avoid a local MATLAB installation, we uploaded the app to a MATLAB online repository for  
191 cloud-based computing. For image processing, the file types .tif (microscopy images) and .csv  
192 (for ROI data) for each image were input into the MNPmApp. The appropriate image channels  
193 were associated with the MNPs (HLA-DR, green) and cell nuclei (DAPI, blue). Threshold and  
194 disk size values were adjusted to reflect previously identified optimum values of 0.1 and 6,  
195 respectively. The appropriate conversion factor for digital images was used to convert pixels to  
196 micrometers. Image processing was then initiated with use of the run feature. A sample input  
197 form and a sample data output window are shown in **Supplemental Fig. 1**.

198

#### 199 Manual cell counting:

200 Manual cell counts were performed using the Cell Counter plugin in ImageJ. For  
201 optimization and validation of MNPmApp, 3-4 images were selected for generation of receiver

202 operating characteristics (ROC) curves with different threshold and disk size settings, and 12  
203 images were analyzed as the gold standard dataset to determine sensitivity and specificity of  
204 MNP identification by MNPmApp. For these analyses, MNPs were identified based on the  
205 presence of green fluorescent stain around a central nucleus by JS. In addition, previously  
206 obtained cell counts performed on the complete set of 57 images by two other researchers (DB  
207 and JD) that were based on identification of green fluorescent signal alone were used for  
208 comparison.

209

210 Statistical analysis:

211 Data were analyzed using GraphPad Prism version 9 (GraphPad Software, San Diego,  
212 CA, USA) or MATLAB. For each donor, data from 1 – 5 individual digital images covering the  
213 entire tissue area available on the tissue array were averaged and expressed as a single data  
214 point. Results are presented as individual data points and/or mean  $\pm$  standard deviation (SD).  
215 Differences between values were analyzed for statistical significance by Student's *t* test, the non-  
216 parametric Kruskal-Wallis test, one-way or two-way ANOVA with appropriate multiple  
217 comparisons tests. Differences were considered significant at  $P \leq 0.05$ . In addition, the  
218 Kolmogorov-Smirnov test and the Pearson's  $X^2$  test were used to compare distance distributions  
219 between observed and randomized datasets. Z scores were calculated as follows: (observed  
220 mean distance - mean of simulated mean distances) / (standard deviation of simulated mean  
221 distances). Sensitivity and specificity of MNP recognition by MNPmApp were calculated based  
222 on manual counts performed by a researcher (J.S.) used as the gold standard for true positives  
223 (TP) and true negatives (TN). Events recognized by MNPmApp, but not the researcher were  
224 considered false positives (FP) and events recognized by the researcher, but not by MNPmApp  
225 were considered false negatives.

226

227 **Results:**

228 *Development and validation of an image analysis application (MNPmApp) to assess spatial*  
229 *distribution of MNPs in human mucosal tissue sections:*

230 In our previous studies, we showed that MNPs in human gastric mucosa communicate  
231 with the gastric epithelium through direct molecular interactions and soluble mediators and that  
232 these interactions are impacted by *H. pylori* infection (3,16-18). To analyze the interactions of  
233 MNPs with the gastric epithelium as well as with other MNPs *in situ*, we sought to develop an  
234 automated digital analysis tool to perform unbiased, statistically relevant high throughput image  
235 analyses. As previously described, gastric MNPs were identified based on immunofluorescence  
236 labeling for the major histocompatibility class II molecule HLA-DR and were found either directly  
237 adjacent to the epithelium (**Fig. 1A,B**) or were distributed throughout the lamina propria (**Fig.**  
238 **1A,C**). The MNPs frequently formed aggregates or clusters with direct contacts between  
239 individual MNPs (**Fig. 1D,E**), whereas other regions contained only solitary MNPs (**Fig. 1F**). The  
240 image analysis tool MNPmApp was designed to quantify these different spatial distribution  
241 patterns of the MNPs. Since MNPs have an irregular morphology with varying numbers of  
242 dendrites, MNP-specific HLA-DR signal intensity was integrated across a concentric disk area  
243 with each cell nucleus used as the center, and data points with signals above a defined threshold  
244 were identified as MNPs (**Fig. 1G**). Distances between identified MNPs and the manually  
245 selected basolateral border of the epithelium and distances between identified MNPs and the  
246 nearest other MNP were determined using “nearest neighbor” measurements (**Fig. 1F**).

247

248 *Processing of digital images with MNPmApp:*

249 Digital images of gastric tissues immunofluorescently stained for HLA-DR, cytokeratin,  
250 and cell nuclei were prepared for analysis with the MNPmApp by manual selection of the basal  
251 epithelial border using the brush selection tool in ImageJ, which created a region of interest

252 (ROI) (**Fig. 2A**). Image processing by MNPmApp then involved splitting a multicolored tif. image  
253 into the individual color channels (**Fig. 2B-D**). Next, all cell nuclei present within the selected ROI  
254 (**Fig. 2E**) were identified and a yellow marker was placed in the center of each nucleus (**Fig. 2F**).  
255 The final step involved the identification of HLA-DR signal that exceeded a certain threshold  
256 within a defined area (disk size) around the nuclear centers (**Fig. 2G**). An output image showing  
257 the selected epithelial border as well as the identified MNPs, labeled with pink dots, was then  
258 generated for verification of MNPmApp performance (**Fig. 2H**).

259

260 Optimization and validation of MNP recognition by MNPmApp:

261 We next sought to optimize the automated MNP recognition by MNPmApp using different  
262 settings for threshold and disk size. To that end, three representative images were selected, and  
263 MNP identification by MNPmApp was compared to manual identification at 14 different threshold  
264 settings (range: 0-0.5; **Fig. 3A,C**). For this gold standard dataset, only MNPs with a strong HLA-  
265 DR signal associated with a DAPI-positive nucleus were counted to replicate the criteria used by  
266 MNPmApp. Cells identified manually and by MNPmApp also were compared using 10 different  
267 disk size settings (range: 1-10) in four individual images (**Fig. 3B,D**). Receiver operating  
268 characteristic curves (ROCs) (19) were plotted, and points closest to the top left hand corner of  
269 the plots were selected as the best compromise between sensitivity and specificity (red symbols,  
270 **Fig. 3C,D**). These points corresponded to a threshold of 0.1 and a disk size of 6. A further  
271 comparison between manual counts and automated counts performed by MNPmApp using the  
272 predetermined optimum threshold and disk size values on 12 microscopic images revealed a  
273 sensitivity of  $76.4 \pm 15.1\%$  (**Fig. 3E**) and a specificity of  $98.3 \pm 1.6\%$  (**Fig. 3F**). We did not detect  
274 a significant difference in sensitivity and specificity of MNP detection between samples from *H.*  
275 *pylori*-infected and non-infected samples (**Fig. 3E,F**). These data show that, with optimized

276 threshold and disk size settings, MNPmApp successfully identifies MNPs in the gastric tissue  
277 sections independent of *H. pylori*-infection status.

278

279 *H. pylori* infection does not significantly impact MNP density within the gastric mucosa:

280 We next used a data set of 57 digital images from 19 gastric biopsy samples present on  
281 the tissue microarray to determine whether *H. pylori* infection alters the number of HLA-DR<sup>+</sup>  
282 MNPs in the human gastric lamina propria. Manual counts previously obtained by two  
283 researchers using this dataset were compared to data obtained using MNPmApp. As shown in  
284 **Fig. 4A,B**, *H. pylori* infection had no significant impact on the percentage of HLA-DR<sup>+</sup> MNPs  
285 identified by either manual counting or by MNPmApp. Linear regression analysis revealed a  
286 significant correlation between manual and automated counts, albeit with a low R<sup>2</sup> value of 0.29  
287 (**Fig. 4C**). Similar data were obtained when HLA-DR<sup>+</sup> MNP density in the gastric mucosa was  
288 analyzed as cells per tissue area (**Fig. 4D-F**). In general, MNPmApp counted fewer cells than the  
289 researchers, likely because cell counts made by the two researchers were based on surface  
290 staining alone regardless of whether a nucleus was visible. Interestingly, correlation between  
291 data obtained by MNPmApp and manual counts was similar to correlation between manual  
292 counts data obtained by two independent researchers (**Fig. 4G,H**). Although we were unable to  
293 confirm the *H. pylori*-induced MNP recruitment seen in earlier studies (18,20), our data indicate  
294 that image analysis by MNPmApp yields results comparable to those obtained by manual  
295 counting.

296

297 *MNPmApp* reveals randomized MNP-epithelial distances but smaller than anticipated MNP-MNP  
298 distances in human gastric mucosa:

299 In order to quantify MNP distribution within the gastric mucosa, we used MNPmApp to  
300 determine the distances between individual MNPs and the epithelium as well as the distances  
301 between each MNP and its nearest neighbor. Observed data were compared to 1,000  
302 randomized datasets generated using Monte Carlo modeling for each image. Distance  
303 distribution data for a single image are shown in **Fig. 5A, B**. In this particular image, a clear  
304 deviation of cellular distance distribution from the simulated distribution pattern was observed.  
305 However, mean distances between MNPs and the epithelium for all images did not differ  
306 significantly between observed and randomized datasets (**Fig. 5C**). Similarly, a more detailed  
307 statistical analysis where we compared observed and simulated MNP-epithelial distance data for  
308 individual image files using multiple statistical tests revealed significant differences in only 23-  
309 40% of the images (**Supplemental Table 1**). As expected, randomized cell placement resulted in  
310 more extreme maximum and minimum MNP-epithelial distances than those that were observed  
311 in the tissues. We also observed a strong, highly significant correlation between the observed  
312 and randomized data ( $R^2 = 0.81$ ,  $P < 0.001$ ).

313 Interestingly, observed mean distances between MNPs and their nearest neighbors were  
314 significantly smaller than distances measured for randomly placed cells (**Fig. 5D**), consistent with  
315 the presence of MNP clusters in the tissues, as shown in **Fig. 1D,E**. Significantly lower than  
316 expected distances between individual MNPs also were seen for 72-89% of datasets when  
317 distance distributions of individual images were analyzed (**Supplemental Table 2**). Again,  
318 randomized MNP placement resulted in more extreme minimum and maximum MNP-MNP  
319 distances than observed data, and randomized MNP-MNP distances strongly correlated with the  
320 observed data (**Fig. 5D**). Overall, the strong correlation and limited differences in cell distribution  
321 statistics between real and randomized cell placement within the gastric mucosa indicate that  
322 structural features inherent to the tissues likely have the strongest impact on MNP distribution.

323 To test our original hypothesis that epithelial mediators induced upon *H. pylori* infection  
324 recruit MNPs, leading to increased accumulation of MNPs at the epithelial interface in *H. pylori*-  
325 positive tissues, we compared actual and randomized MNP distribution in *H. pylori*-infected and  
326 non-infected tissues. However, the presence or absence of *H. pylori* infection had no significant  
327 impact on either mean MNP-epithelial distances or on MNP-MNP distances, although there was  
328 an unexpected trend for increased MNP-epithelial distances in the *H. pylori*-positive samples  
329 (Fig. 6A,B).

330

### 331 **Discussion:**

332 In this study, we have developed and validated an image analysis application, MNPmApp,  
333 that maps MNPs in immunohistochemically stained sections of complex tissues. MNPmApp  
334 automatically identifies and counts MNPs, determines their spatial relationships with other cells  
335 and structures and compares observed MNP distribution with a randomized cell distribution  
336 generated by Monte Carlo modeling.

337 Automated cell identification of cells in immunohistochemical images enables high throughput  
338 processing and is less prone to bias than manual analysis performed by investigators (21).  
339 However, since MNPs have pleiomorphic shapes with long dendrites, they are difficult to identify  
340 using standard digital image analysis algorithms (11). To assess MNP density, we and others  
341 have previously used pixel counts, which can accurately identify changes in staining patterns, but  
342 do not provide information on cell numbers (20,22). Suberi et al. (23) developed an image  
343 processing algorithm to identify and count cells with morphological characteristics of DCs in  
344 peripheral blood mononuclear cell samples. DC identification was based on the recognition of  
345 characteristic shape signature in phase contrast images of tissue cultures and achieved a  
346 sensitivity of 72% and a specificity of 65%. However, this approach is unsuitable for the analysis  
347 of tissue sections as dendrites or other membrane extensions may be cropped. Wagner et al.

348 (11) developed an approach to count macrophages in the tumor microenvironment of diffuse  
349 large B cell lymphomas based on immunofluorescently labelled tissue sections. The algorithm  
350 used a Rudin-Osher-Fatemi (ROF, removes noise from images) filter-based segmentation  
351 approach combined with floating intensity thresholding and rule-based feature detection for  
352 automated macrophage counting and achieved a >90% correlation with manual counting. In our  
353 study, we showed that MNPmApp identifies gastric HLA-DR<sup>+</sup> MNPs with a high degree of  
354 sensitivity and specificity in a gold standard dataset validated by a researcher. Interestingly, we  
355 found a highly significant but only moderate correlation between manual and automated count for  
356 a larger set of digital images. Notably, correlation between automated analyses and manual  
357 counts is frequently poor (24), and correlation between manual counts and automated counts  
358 was similar to the correlation between manual counts performed by two independent  
359 researchers, indicating that MNP recognition by MNPmApp was adequate, but that our staining  
360 protocol may require further optimization to more clearly identify human gastric MNPs.

361 A key innovative aspect of MNPmApp is that it maps MNP distribution in the gastrointestinal  
362 mucosa by measuring distances between identified MNPs and the epithelium and between each  
363 MNP and its nearest neighboring MNP. Automated analysis of the spatial distribution of immune  
364 cells is an emerging area of research and will ultimately improve our understanding of functional  
365 cellular interactions within complex tissues. In a recent study, Tasnim et al. (25) measured the  
366 spatial relationship of T cells with cells within lymph nodes using the Pearson correlation  
367 coefficient and normalized mutual information, a measure of spatial association that is  
368 independent of specific structures but provides some information on randomness. Tasnim's  
369 approach therefore is conceptually similar to our study but lacks a user-friendly application  
370 interface. Saylor et al. (10) developed an image analysis algorithm to analyze the organization of  
371 myeloid cells and macrophages in the tumor microenvironment and showed a preferential  
372 accumulation of CD68<sup>+</sup> CD163<sup>+</sup> macrophages in the vicinity of the tumor. Their algorithm was



373 similar to our approach in that it assessed fluorescent signals in donut-shaped areas around  
374 cellular nuclei to identify irregularly shaped cells (10). Zwing et al. (26) used a commercially  
375 available software (HALO, Indica Labs) to identify multiple immune cell subsets in human  
376 colorectal cancer tissues, and distances between cell pairs were determined based on cellular X-  
377 Y coordinates, with normalization against myeloid cell density. A comparative study of multiple  
378 cell mapping algorithms would be useful to better understand the strengths and weaknesses of  
379 the different approaches.

380 In addition to performing distance measurements, MNPmApp also enabled us to evaluate  
381 whether observed cell distributions can be explained by random mechanisms, since observed  
382 data were compared to randomized cell placements generated using a Monte Carlo modeling  
383 approach (12). Previously, Guidolin et al. (27) successfully used a spatial statistic approach  
384 involving computer generation of point patterns that were placed in the area under investigation  
385 according to a random (Poisson) distribution (12). We here used a similar approach where each  
386 observed cell distribution was compared to 1,000 randomized cell patterns. We hypothesized  
387 that mean distances of gastric between gastric MNPs and the epithelial basement membrane  
388 would be smaller than mean distances generated using randomized cell placement, based on  
389 our previous study that showed chemokine-dependent MNP recruitment by gastric epithelial cells  
390 (18). However, our data did not support this hypothesis. Rather, the tight correlation between  
391 distance statistics in observed and randomized data sets strongly suggest that structural features  
392 of individual tissue sections and ROIs are the major determinants of cellular distribution in  
393 morphologically complex tissues. Although MNPs display chemotactic activity towards the gastric  
394 epithelium, especially upon *H. pylori* infection, additional mechanisms affecting cell migration and  
395 placement in the gastric mucosa also may have contributed to non-significant association  
396 between MNPs and the epithelium. For example, MNPs can interact with neuronal or vascular  
397 cells present in the mucosa (28), and DCs will routinely leave the lamina propria and migrate

398 through lymphatics towards draining lymph nodes once they have captured antigens (29). Thus,  
399 multiple specific interactions between with a variety of cell types likely occur in parallel and may  
400 have obscured specific interactions between MNPs and the epithelial layer.

401 Interestingly, we did observe significantly smaller MNP-MNP distances than predicted based  
402 on random cell placement. In the intestine, aggregates of DCs can develop in the lamina propria  
403 and attract T cells as a precursor to the development of manifest inflammation in murine transfer  
404 colitis (30,31). In the stomach, small aggregates of HLA-DR<sup>+</sup> MNPs are frequently present, but  
405 their functional relevance for gastric homeostasis and disease has not yet been explored.  
406 Interestingly, presence or absence of *H. pylori* infection had no significant impact on MNP-MNP  
407 distances based on our MNPmApp analyses. Alternative analyses investigating the spatial  
408 relationships between MNPs and the vasculature could reveal whether the cells cluster around  
409 lymph and blood vessels as pathways for MNP migration into and out of mucosal tissues.

410 We originally developed the MNPmApp analysis tool to assess whether MNPs in the human  
411 stomach are preferentially recruited to the gastric epithelium upon *H. pylori* infection. Contrary to  
412 our expectations and previous studies (18,20,32,33), we did not find an increase in MNP density  
413 upon *H. pylori* infection in the current dataset, neither using manual counting by two independent  
414 researchers, nor using automated cell identification with MNPmApp. There are several possible  
415 explanations for these divergent findings: First, since samples were obtained from human  
416 subjects with natural infection, disease stage and severity likely vary. Second, distribution of *H.*  
417 *pylori* and the associated inflammatory alterations vary across different regions of the gastric  
418 mucosa; therefore, the OLGA approach for diagnostic histopathology scoring recommends the  
419 analysis of at least five biopsies from different regions of the stomach (34). Since we used a  
420 tissue microarray to minimize differences in staining performance, only one small piece of tissue  
421 was included from each donor, which may have excluded tissue regions with more prominent  
422 inflammation (35). Lastly, the staining approach we used here was not specific for a particular

423 type of MNP, e.g. DC or macrophages, and may also have labelled B cells. Therefore, changes  
424 in the density or spatial distribution of any one specific cell subset may have been masked by  
425 other cells identified by the antibody that was used here. Novel labeling techniques enable  
426 acquisition of multiplexed fluorescent microscopy images for cell subset identification with more  
427 than four markers (36). Future versions of MNPmApp will include additional fluorescence  
428 channels, so that cell populations with more complex phenotypes can be identified and  
429 distinguished based on marker co-localization.

430 We had expected smaller MNP-epithelial distances upon *H. pylori* infection, since *H. pylori*  
431 infection leads to the induction of epithelial chemokines that attract MNPs (18). Conversely, we  
432 saw a trend for increased distances between MNPs and epithelial cells in the *H. pylori*-infected  
433 samples. This trend was found in the mean observed MNP-epithelial cell distances seen in *H.*  
434 *pylori* infected versus healthy samples and was also reflected in the differences between the  
435 observed compared to the simulated random cell distributions. Possibly, alterations to the gastric  
436 lamina propria upon *H. pylori* infection, such as increased recruitment of other inflammatory cells  
437 to the epithelial interface (37) or inflammation-induced remodeling of the extracellular matrix (38)  
438 may have contributed to the observed changes in average MNP-epithelial distance.

439 One limitation of the current MNPmApp design was that we did not include an automated  
440 approach to identify the epithelium, requiring manual image processing to label the ROIs. Future  
441 work will include the development of an optimized staining protocol to delineate the epithelial  
442 basement membrane, possibly using laminin staining, so that the epithelium can be automatically  
443 identified. One other limitation of our study was that accurate manual counting of cells that  
444 formed aggregates was challenging, which made it difficult to determine the sensitivity of  
445 automated MNP identification in these areas. Again, including additional fluorescent channels  
446 and thus surface markers could help overcome this issue by enabling the identification of smaller  
447 cell populations. We have made the current version of MNPmApp available as a shared resource

448 on GitHub, so that it can be utilized by other researchers, and new versions of the app will be  
449 deposited in the same location. We anticipate that MNPmApp will be a useful tool for other  
450 researchers for quantitative and automated detection of MNPs in histological images.

451 **Acknowledgements:**

452 We gratefully acknowledge funding for this study by NIH grants P30GM110732 (to D.  
453 Bimczok and D.Z.), U01EB029242 (to D. Bimczok), P20GM103474 (to D. Bimczok, J.S. and D.  
454 Bair) and the M.J. Murdock Charitable Trust Partners in Science Program (to R.A.), and the  
455 Simons Foundation collaboration grant for mathematicians #586942 (to D.Z.)

456

457 **Author contributions:**

458 Conceived and designed the analysis: D. Bimczok, D.Z., C.P.; collected the data: J.S.,  
459 R.A., J.D.; designed the analysis tools: C.P., D. Bair, J.L., D.Z.; performed the analysis: J.S., D.  
460 Bimczok, D.Z.; wrote the original draft of the paper: J.S., D.B., R.A., C.P., reviewed and edited  
461 the paper: D. Bimczok, J.S., D. Bair, C.P., J.D., P.R.H., D.Z.; provided clinical samples: P.R.H.

462

463 **Conflict of Interest:**

464 The authors have no conflicts of interest to declare.

465

466

467 **Figure Legends**

468 **Figure 1: Analysis of MNP positioning within the human gastric mucosa. (A)** MHC-II-  
469 positive MNPs (green) are positioned at variable distances from the gastric epithelium  
470 (cytokeratin-positive, red). Cell nuclei are labeled with DAPI (blue). Bar = 50  $\mu$ m. **(B)** Sample  
471 MNP positioned at a larger distance from the epithelium, indicated by the white dashed line. **(C)**  
472 Sample MNP positioned directly adjacent to the epithelium. White dashed line indicates position  
473 of the basement membrane. **(D)** Some MNPs form cell clusters within the gastric mucosa, with  
474 very small distances between individual MNPs. Bar = 50  $\mu$ m. **(E)** Sample MNP cluster with MNP-  
475 MNP distances close to zero. **(F)** Solitary MNP with >50  $\mu$ m of distance between this MNP and  
476 its nearest neighbor. **(G)** MNP identification approach based on position of cell nuclei and  
477 surrounding HLA-DR labeling (disk size). Staining intensity for the MNP label is integrated using  
478 the selected concentric area around the nuclear center. **(H)** Measurement of MNP-epithelial  
479 distances (blue lines) and MNP-MNP distances (red dashed lines) using the “nearest neighbor”  
480 approach.

481

482 **Figure 2: Image processing for automated identification of MNPs using MNPmApp. (A)**  
483 Original merged image showing a paraffin-embedded section of human gastric mucosa with  
484 HLA-DR-positive mononuclear phagocytes (green), cytokeratin-positive epithelial cells (red) and  
485 cell nuclei (DAPI, blue). Manually generated yellow line indicate the position of the epithelial  
486 basement membrane, separating the epithelium from the lamina propria (region of interest, ROI).  
487 Bar = 50  $\mu$ m. **(B)** Single color image showing cytokeratin-positive epithelial cells (red). **(C)** Single  
488 color image showing DAPI-positive nuclei (blue). **(D)** Single color image showing HLA-DR-  
489 positive MNPs (green). **(E)** Region of interest (ROI) mask outlining the gastric lamina propria in  
490 yellow and the epithelium and acellular areas of the slide in blue. **(F)** Position of automatically  
491 identified nuclei in the lamina propria. Nuclear centers are indicated by yellow dots. **(G)** Position

492 of automatically identified MNPs. Brighter coloring indicates more intense HLA-DR expression.  
493 (H) Processed image showing epithelial outlines, blue nuclei and green MNPs. Identified MNPs  
494 are labeled with a pink dot.

495

496 **Figure 3: Optimization and validation of MNP identification by MNPmApp. (A)**

497 Representative images showing MNPs identified by MNPmApp using different threshold values  
498 for MNP labeling intensity. Bar = 50  $\mu$ m. (B) Representative images showing MNPs identified by  
499 MNPmApp using different disk sizes, which reflects the area of the image around an identified  
500 cell nucleus that is analyzed for HLA-DR signal (see Fig 1F). (C, D) MNPs identified by  
501 MNPmApp were compared to cells manually identified by a researcher (J.S.). True positive and  
502 false positive rate for MNPmApp cell identification using (C) a range of different threshold values  
503 or (D) different disk sizes was determined based on manual counting as the gold standard. Dots  
504 represent true/false positive rates for three (threshold,C) or four (disk size,D) digital images  
505 analyzed with 14 different threshold values and 10 different disk sizes, respectively. Red symbols  
506 represent values with optimum MNP identification obtained using a threshold of 0.1 and a disk  
507 size of 6. (E) Sensitivity and (F) specificity of MNP identification by MNPmApp determined by  
508 comparing automatically identified to manually identified cells using optimized settings (threshold  
509 0.1, disk size 6). Data were obtained using 12 images of gastric tissues with and without *H. pylori*  
510 infection.

511

512 **Figure 4: Impact of *H. pylori* infection on MNP density in gastric tissue sections. (A, B)**

513 Digital images of gastric tissue sections from seven *H. pylori*-negative and twelve *H. pylori*-  
514 positive subjects were analyzed for the percentage of HLA-DR<sup>+</sup> MNPs out of all lamina propria  
515 cells using (A) manual counting or (B) automated identification of MNPs and nuclei with the  
516 MNPmApp. Total cell numbers were determined based on total nuclear counts (DAPI channel).

517 Data were analyzed by Student's *t* test, with no significant difference observed. **(C)** Linear  
518 correlation between MNP percentage determined by manual and automated counting; Pearson's  
519 correlation coefficient. **(D, E)** Digital images were analyzed for the number of HLA-DR<sup>+</sup> MNPs per  
520 area of gastric lamina propria using **(D)** manual counting or **(E)** automated identification of MNPs.  
521 Tissue area was measured based on the manual selection of the gastric lamina propria (LP)  
522 shown in Fig, 2A and E. **(F)** Linear correlation between MNP numbers per area defined as HLA-  
523 DR positive cells x1,000 per sq  $\mu\text{m}$  based on manual and automated counts; Pearson's  
524 correlation coefficient. **(G)** Linear correlation between MNP percentage determined by two  
525 independent researchers using manual counting; Pearson's correlation coefficient. **(H)** Linear  
526 correlation between MNP numbers per tissue area defined as HLA-DR positive cells x1,000 per  
527 sq  $\mu\text{m}$  determined by two independent researchers using manual counting; Pearson's correlation  
528 coefficient.

529

530 **Figure 5: Monte Carlo modeling using MNPmApp reveals random MNP-epithelial**  
531 **distances, but smaller than anticipated MNP-MNP distances.** **(A)** Representative distribution  
532 plot from one digital image showing the mean observed MNP-epithelial cell distance compared to  
533 means of 1,000 randomized sets (left panel) and observed versus randomized MNP-epithelial  
534 distances for each individual cell in the image (right panel); **(B)** Representative distribution plot  
535 from one digital image showing the mean observed MNP-MNP distance compared to the 1,000  
536 simulated means (left panel) and individual observed versus randomized MNP-MNP distances  
537 (right panel); **(C)** Comparison of mean, maximum and minimum MNP-epithelial distances in  
538 digital images from n=19 human subjects; mean  $\pm$  SD. \*\*\* Indicates statistically significant  
539 differences at  $P \leq 0.001$  (unpaired Student's *t* test) right panel shows significant correlation  
540 between observed and randomized data. **(D)** Comparison of mean, maximum and minimum  
541 MNP-MNP distances in digital images from n=19 human subjects; mean  $\pm$  SD. \*\*\* Indicates



542 statistically significant differences at  $P \leq 0.001$  (unpaired Student's  $t$  test) right panel shows  
543 significant correlation between observed and randomized data.

544

545 **Figure 6: *H. pylori* infection does not significantly alter the distribution of MNPs within**  
546 **the gastric mucosa.** Comparison of observed and randomized data generated by Monte Carlo  
547 modeling for (A) MNP-epithelial distances and (B) MNP-MNP distance in healthy ( $n=7$ ) and *H.*  
548 *pylori*-infected ( $n=12$ ) human gastric mucosa. Individual data points and mean  $\pm$  SD are shown;  
549 data were analyzed using 2-way ANOVA with Šídák's multiple comparisons test.

550

551 **Supplemental Figure 1: MNPmApp user interface.** (A) Data input window for file upload  
552 and adjustment of threshold, disk size, channel assignments and image resolution. (B) Data  
553 output screen with summarized data in a \*.txt file and single cell data for the observed and  
554 randomized cell distances in individual \*.csv-files.

555

556 **Supplemental Table 1: Image-level data comparing observed versus simulated MNP-**  
557 **epithelial cell distances.** Observed MNP-epithelial cell distance data for each image were  
558 compared to randomized datasets from 1,000 simulations using the Kolmogorov-Smirnov,  
559 Kruskal-Wallis and Pearson's  $X^2$  test. Table shows individual  $P$ -values and the Z scores,  
560 calculated as (observed mean distance - mean of simulated mean distances) / standard  
561 deviation of simulated mean distances. Significant values are labelled green.

562

563 **Supplemental Table 2: Image-level data comparing observed versus simulated MNP-**  
564 **MNP distances.** Observed MNP-MNP distance data for each image were compared to

565 randomized datasets from 1,000 simulations using the Kolmogorov-Smirnov, Kruskal-Wallis and  
566 Pearson's  $X^2$  test. Table shows individual  $P$ -values and the Z scores, calculated as (observed  
567 mean distance - mean of simulated mean distances) / (standard deviation of simulated mean  
568 distances). Significant values are labelled green.

569

570 **References**

- 571 1. Reynolds G, Haniffa M. Human and Mouse Mononuclear Phagocyte Networks: A Tale of  
572 Two Species? *Front Immunol* 2015;6:330.
- 573 2. Bimczok D, Grams JM, Stahl RD, Waites KB, Smythies LE, Smith PD. Stromal regulation  
574 of human gastric dendritic cells restricts the Th1 response to *Helicobacter pylori*.  
575 *Gastroenterology* 2011;141:929-38.
- 576 3. Bimczok D, Smythies LE, Waites KB, Grams JM, Stahl RD, Mannon PJ, Peter S, Wilcox  
577 CM, Harris PR, Das S and others. *Helicobacter pylori* infection inhibits phagocyte  
578 clearance of apoptotic gastric epithelial cells. *J Immunol* 2013;190:6626-34.
- 579 4. Bimczok D, Kao JY, Zhang M, Cochrun S, Mannon P, Peter S, Wilcox CM, Monkemuller  
580 KE, Harris PR, Grams JM and others. Human gastric epithelial cells contribute to gastric  
581 immune regulation by providing retinoic acid to dendritic cells. *Mucosal Immunol*  
582 2015;8:533-44.
- 583 5. Iliev ID, Spadoni I, Mileti E, Matteoli G, Sonzogni A, Sampietro GM, Foschi D, Caprioli F,  
584 Viale G, Rescigno M. Human intestinal epithelial cells promote the differentiation of  
585 tolerogenic dendritic cells. *Gut* 2009;58:1481-9.
- 586 6. Smythies LE, Sellers M, Clements RH, Mosteller-Barnum M, Meng G, Benjamin WH,  
587 Orenstein JM, Smith PD. Human intestinal macrophages display profound inflammatory  
588 anergy despite avid phagocytic and bacteriocidal activity. *J. Clin. Invest* 2005;115:66-75.
- 589 7. Wollmann T, Erfle H, Eils R, Rohr K, Gunkel M. Workflows for microscopy image analysis  
590 and cellular phenotyping. *J Biotechnol* 2017;261:70-75.

- 591 8. Smith K, Piccinini F, Balassa T, Koos K, Danka T, Azizpour H, Horvath P. Phenotypic  
592 Image Analysis Software Tools for Exploring and Understanding Big Image Data from  
593 Cell-Based Assays. *Cell Syst* 2018;6:636-653.
- 594 9. McQuin C, Goodman A, Chernyshev V, Kamentsky L, Cimini BA, Karhohs KW, Doan M,  
595 Ding L, Rafelski SM, Thirstrup D and others. CellProfiler 3.0: Next-generation image  
596 processing for biology. *PLoS Biol* 2018;16:e2005970.
- 597 10. Saylor J, Ma Z, Goodridge HS, Huang F, Cress AE, Pandol SJ, Shiao SL, Vidal AC, Wu  
598 L, Nickols NG and others. Spatial Mapping of Myeloid Cells and Macrophages by  
599 Multiplexed Tissue Staining. *Front Immunol* 2018;9:2925.
- 600 11. Wagner M, Hansel R, Reinke S, Richter J, Altenbuchinger M, Braumann UD, Spang R,  
601 Loffler M, Klapper W. Automated macrophage counting in DLBCL tissue samples: a ROF  
602 filter based approach. *Biol Proced Online* 2019;21:13.
- 603 12. Besag J, Diggle PJ. Simple Monte Carlo Tests for Spatial Pattern. *Journal of the Royal*  
604 *Statistical Society. Series C (Applied Statistics)* 1977;26:327-333.
- 605 13. Diggle PJ, Besag J, Gleaves JT. Statistical-Analysis of Spatial Point Patterns by Means  
606 of Distance Methods. *Biometrics* 1976;32:659-667.
- 607 14. Handel N, Brockel A, Heindl M, Klein E, Uhlig HH. Cell-cell-neighborhood relations in  
608 tissue sections--a quantitative model for tissue cytometry. *Cytometry A* 2009;75:356-61.
- 609 15. Schneider CA, Rasband WS, Eliceiri KW. NIH Image to ImageJ: 25 years of image  
610 analysis. *Nat Methods* 2012;9:671-5.
- 611 16. Roe MM, Swain S, Sebrell TA, Sewell MA, Collins MM, Perrino BA, Smith PD, Smythies  
612 LE, Bimczok D. Differential regulation of CD103 (alphaE integrin) expression in human

- 613 dendritic cells by retinoic acid and Toll-like receptor ligands. *J Leukoc Biol*  
614 2017;101:1169-1180.
- 615 17. Swain S, Roe MM, Sebrell TA, Sidar B, Dankoff J, VanAusdol R, Smythies LE, Smith PD,  
616 Bimczok D. CD103 (alphaE Integrin) Undergoes Endosomal Trafficking in Human  
617 Dendritic Cells, but Does Not Mediate Epithelial Adhesion. *Front Immunol* 2018;9:2989.
- 618 18. Sebrell TA, Hashimi M, Sidar B, Wilkinson RA, Kirpotina L, Quinn MT, Malkoc Z, Taylor  
619 PJ, Wilking JN, Bimczok D. A Novel Gastric Spheroid Co-culture Model Reveals  
620 Chemokine-Dependent Recruitment of Human Dendritic Cells to the Gastric Epithelium.  
621 *Cell Mol Gastroenterol Hepatol* 2019;8:157-171 e3.
- 622 19. Bray MA, Carpenter A. Advanced Assay Development Guidelines for Image-Based High  
623 Content Screening and Analysis. In: Markossian S, Sittampalam GS, Grossman A,  
624 Brimacombe K, Arkin M, Auld D, Austin CP, Baell J, Caaveiro JMM, Chung TDY and  
625 others, editors. *Assay Guidance Manual*. Bethesda (MD); 2004.
- 626 20. Bimczok D, Clements RH, Waites KB, Novak L, Eckhoff DE, Mannon PJ, Smith PD,  
627 Smythies LE. Human primary gastric dendritic cells induce a Th1 response to *H. pylori*.  
628 *Mucosal Immunol* 2010;3:260-9.
- 629 21. Lopez C, Lejeune M, Salvado MT, Escriva P, Bosch R, Pons LE, Alvaro T, Roig J, Cugat  
630 X, Baucells J and others. Automated quantification of nuclear immunohistochemical  
631 markers with different complexity. *Histochem Cell Biol* 2008;129:379-87.
- 632 22. Inman CF, Singha S, Lewis M, Bradley B, Stokes C, Bailey M. Dendritic cells interact with  
633 CD4 T cells in intestinal mucosa. *J Leukoc Biol* 2010;88:571-8.

- 634 23. Suberi AAM, Zakaria WNW, Tomari R. Dendritic Cell Recognition in Computer Aided  
635 System for Cancer Immunotherapy. *Procedia Computer Science* 2017;105:177-182.
- 636 24. Inman CF, Rees LE, Barker E, Haverson K, Stokes CR, Bailey M. Validation of computer-  
637 assisted, pixel-based analysis of multiple-colour immunofluorescence histology. *J*  
638 *Immunol Methods* 2005;302:156-67.
- 639 25. Tasnim H, Fricke GM, Byrum JR, Sotiris JO, Cannon JL, Moses ME. Quantitative  
640 Measurement of Naive T Cell Association With Dendritic Cells, FRCs, and Blood Vessels  
641 in Lymph Nodes. *Front Immunol* 2018;9:1571.
- 642 26. Zwing N, Failmezger H, Ooi CH, Hibar DP, Canamero M, Gomes B, Gaire F, Korski K.  
643 Analysis of Spatial Organization of Suppressive Myeloid Cells and Effector T Cells in  
644 Colorectal Cancer-A Potential Tool for Discovering Prognostic Biomarkers in Clinical  
645 Research. *Front Immunol* 2020;11:550250.
- 646 27. Guidolin D, Crivellato E, Nico B, Andreis PG, Nussdorfer GG, Ribatti D. An image  
647 analysis of the spatial distribution of perivascular mast cells in human melanoma. *Int J*  
648 *Mol Med* 2006;17:981-7.
- 649 28. Hunyady B, Mezey E, Palkovits M. Gastrointestinal immunology: cell types in the lamina  
650 propria--a morphological review. *Acta Physiol Hung* 2000;87:305-28.
- 651 29. Randolph GJ, Angeli V, Swartz MA. Dendritic-cell trafficking to lymph nodes through  
652 lymphatic vessels. *Nat.Rev.Immunol.* 2005;5:617-628.
- 653 30. Leithauser F, Meinhardt-Krajina T, Fink K, Wotschke B, Moller P, Reimann J. Foxp3-  
654 expressing CD103+ regulatory T cells accumulate in dendritic cell aggregates of the  
655 colonic mucosa in murine transfer colitis. *Am J Pathol* 2006;168:1898-909.

- 656 31. Leithauser F, Trobonjaca Z, Moller P, Reimann J. Clustering of colonic lamina propria  
657 CD4(+) T cells to subepithelial dendritic cell aggregates precedes the development of  
658 colitis in a murine adoptive transfer model. *Lab Invest* 2001;81:1339-49.
- 659 32. Dzierzanowska-Fangrat K, Michalkiewicz J, Cielecka-Kuszyk J, Nowak M, Celinska-  
660 Cedro D, Rozynek E, Dzierzanowska D, Crabtree JE. Enhanced gastric IL-18 mRNA  
661 expression in *Helicobacter pylori*-infected children is associated with macrophage  
662 infiltration, IL-8, and IL-1 beta mRNA expression. *Eur.J Gastroenterol.Hepatol.*  
663 2008;20:314-319.
- 664 33. Kao JY, Zhang M, Miller MJ, Mills JC, Wang B, Liu M, Eaton KA, Zou W, Berndt BE, Cole  
665 TS and others. *Helicobacter pylori* immune escape is mediated by dendritic cell-induced  
666 Treg skewing and Th17 suppression in mice. *Gastroenterology* 2010;138:1046-54.
- 667 34. Rugge M, Pennelli G, Pillozzi E, Fassan M, Ingravallo G, Russo VM, Di Mario F, Gruppo  
668 Italiano Patologi Apparato D, Societa Italiana di Anatomia Patologica e Citopatologia  
669 Diagnostica/International Academy of Pathology Id. Gastritis: the histology report. *Dig*  
670 *Liver Dis* 2011;43 Suppl 4:S373-84.
- 671 35. Koo M, Squires JM, Ying D, Huang J. Making a Tissue Microarray. *Methods Mol Biol*  
672 2019;1897:313-323.
- 673 36. Blenman KRM, Bosenberg MW. Immune Cell and Cell Cluster Phenotyping, Quantitation,  
674 and Visualization Using In Silico Multiplexed Images and Tissue Cytometry. *Cytometry*  
675 *Part A* 2019;95a:399-410.
- 676 37. Blosse A, Lehours P, Wilson KT, Gobert AP. *Helicobacter*: Inflammation, immunology,  
677 and vaccines. *Helicobacter* 2018;23 Suppl 1:e12517.

678 38. Sampieri CL. Helicobacter pylori and gastritis: the role of extracellular matrix  
679 metalloproteases, their inhibitors, and the disintegrins and metalloproteases--a  
680 systematic literature review. Dig Dis Sci 2013;58:2777-83.

681



**Figure 1:**

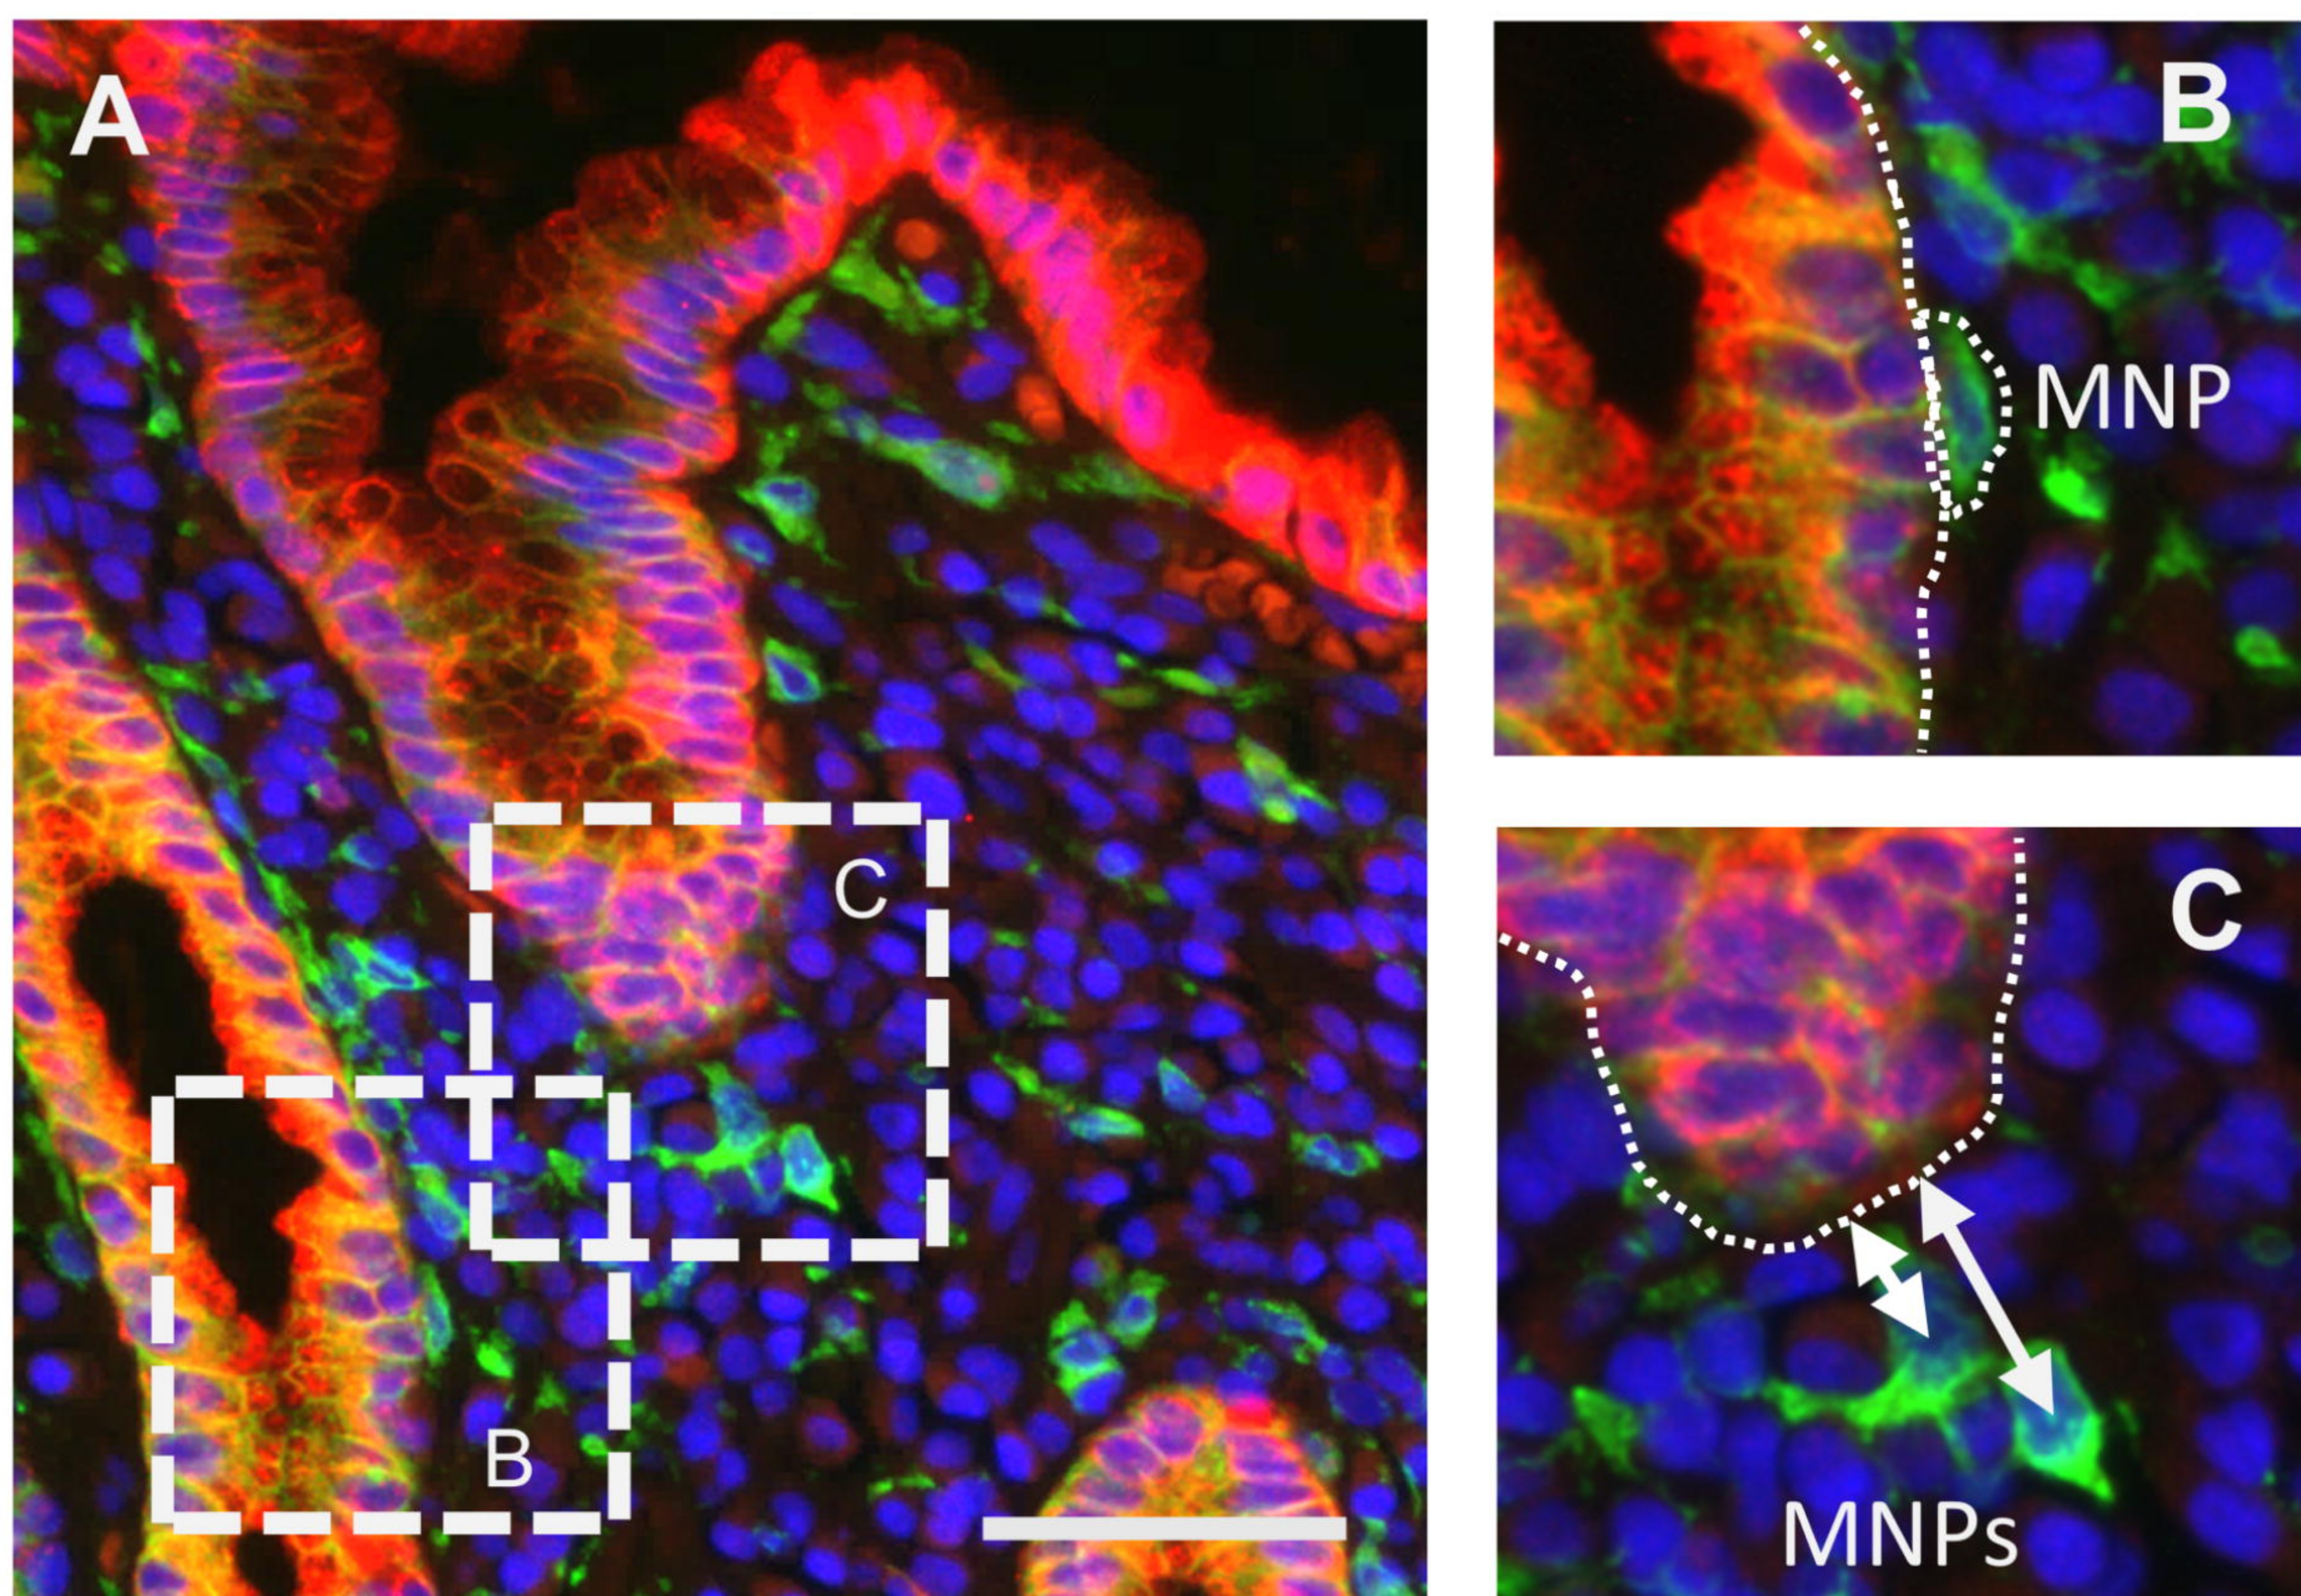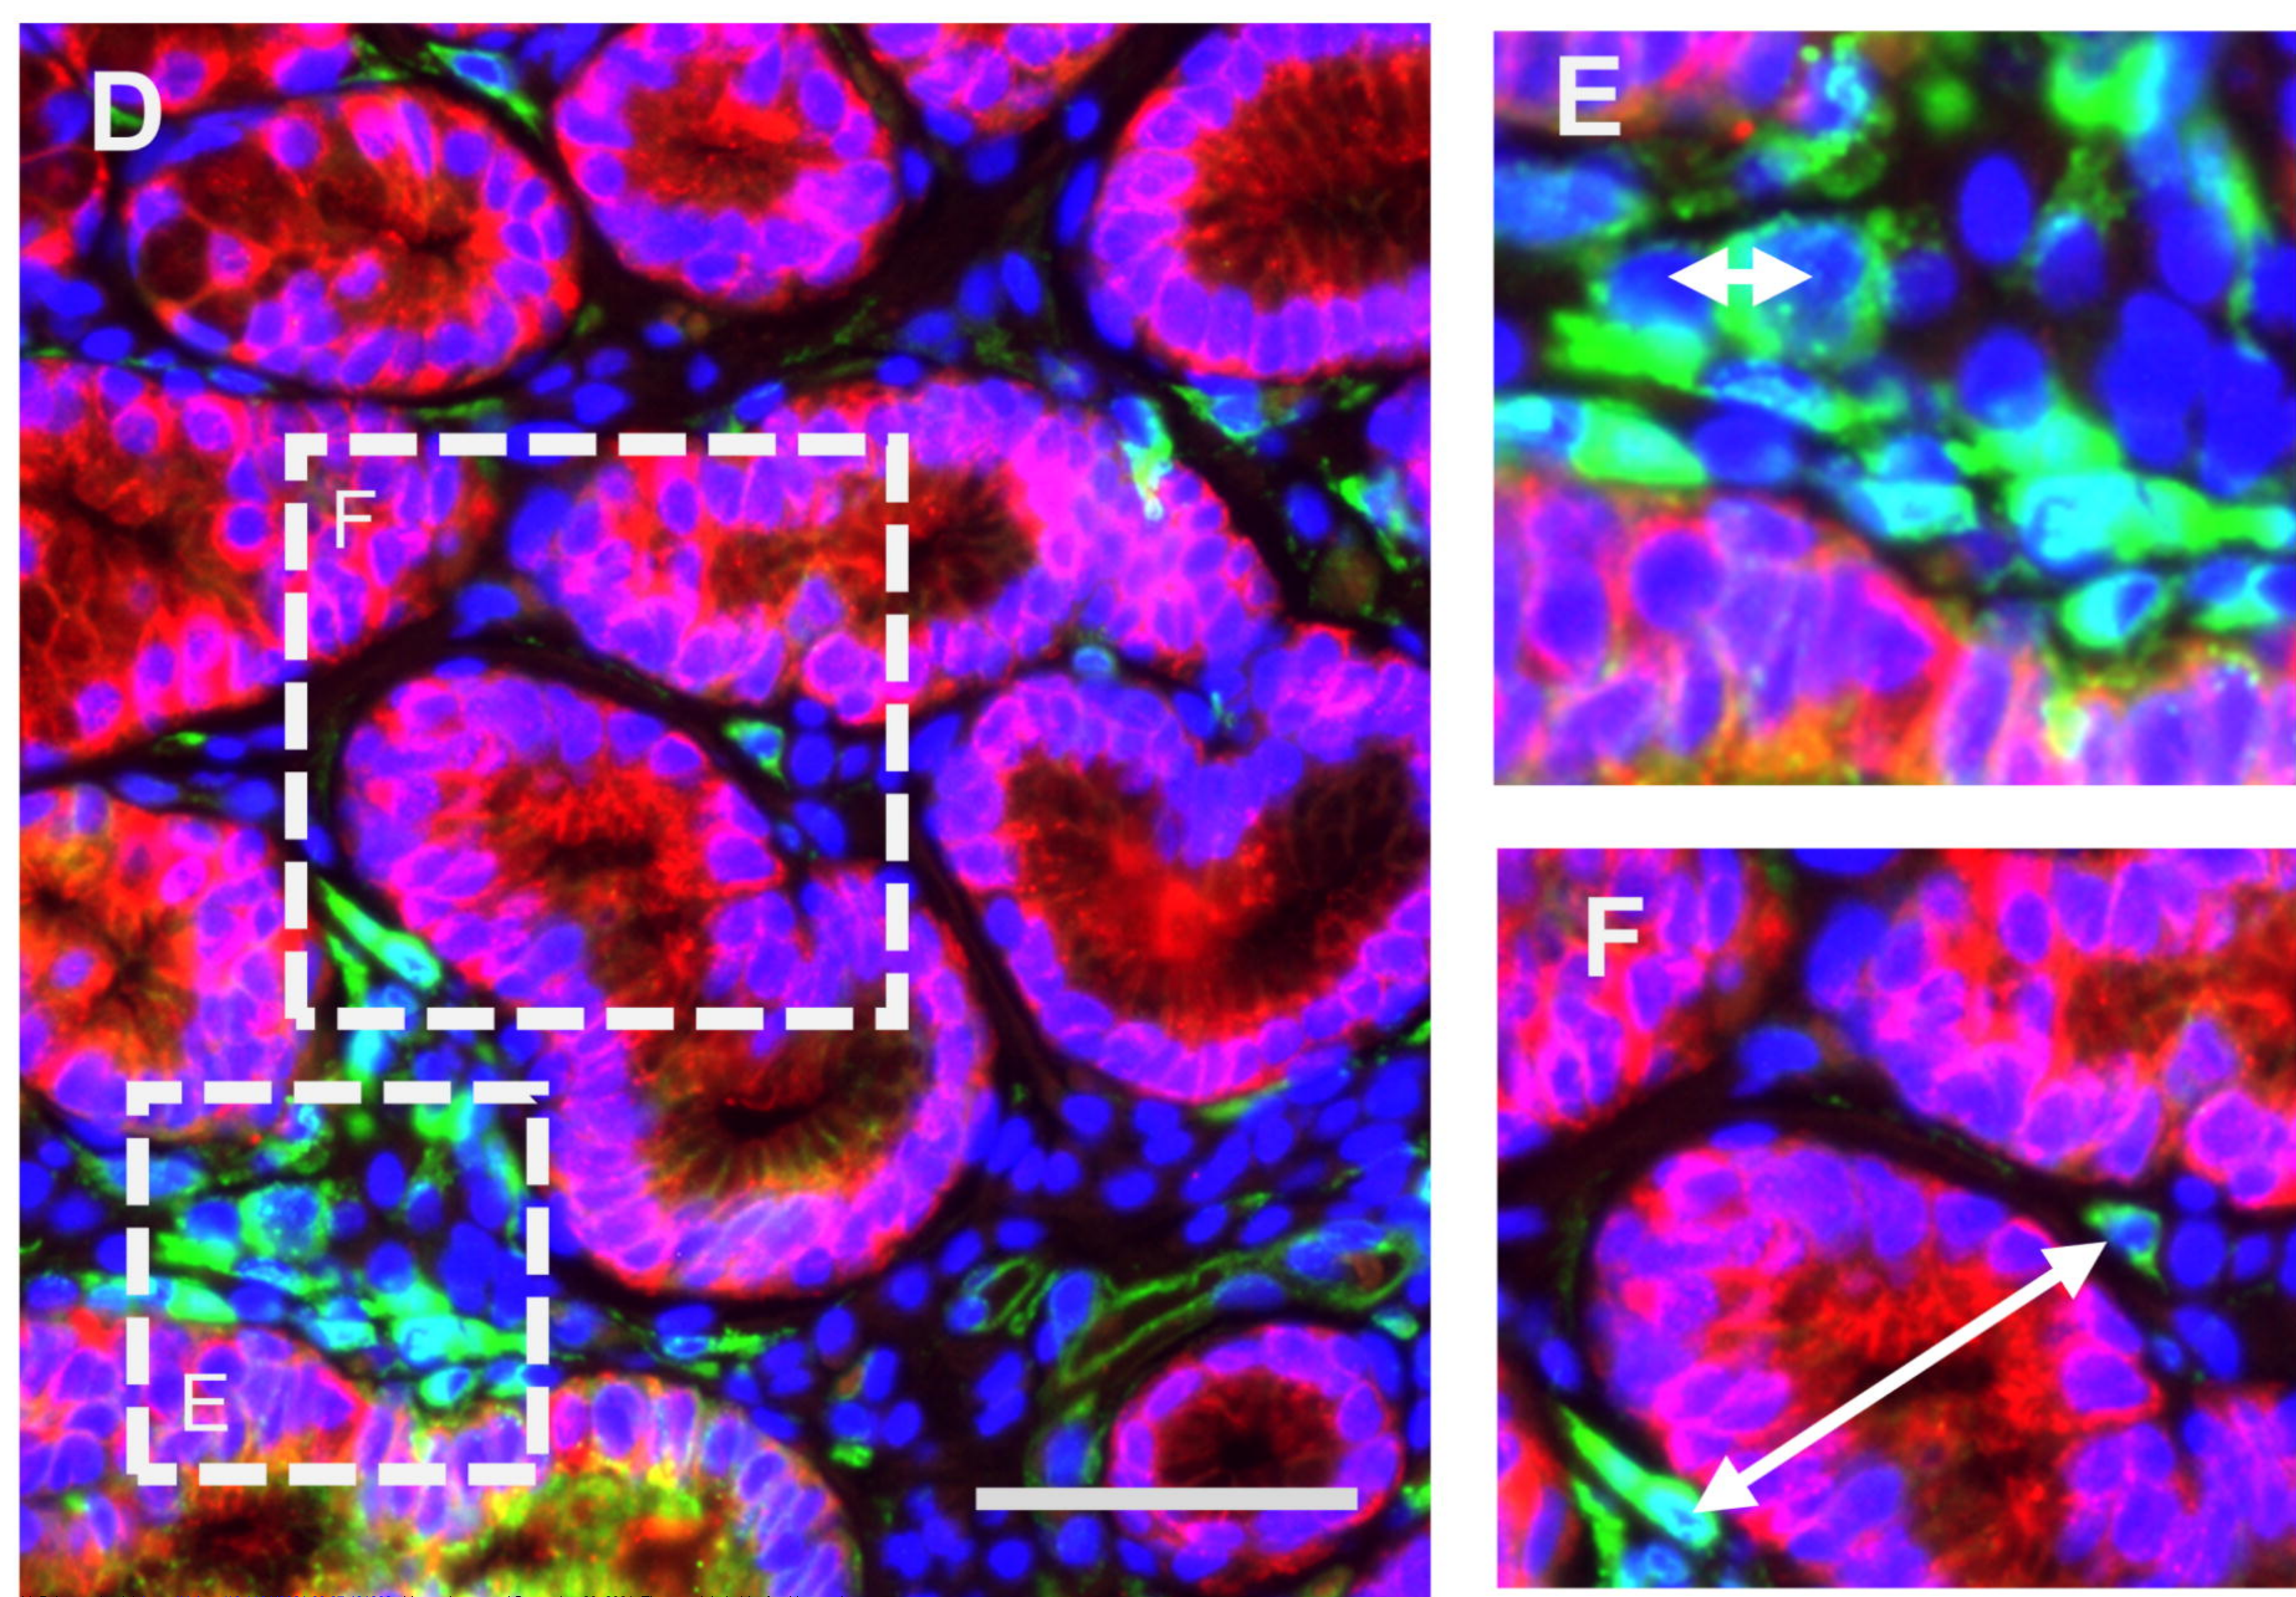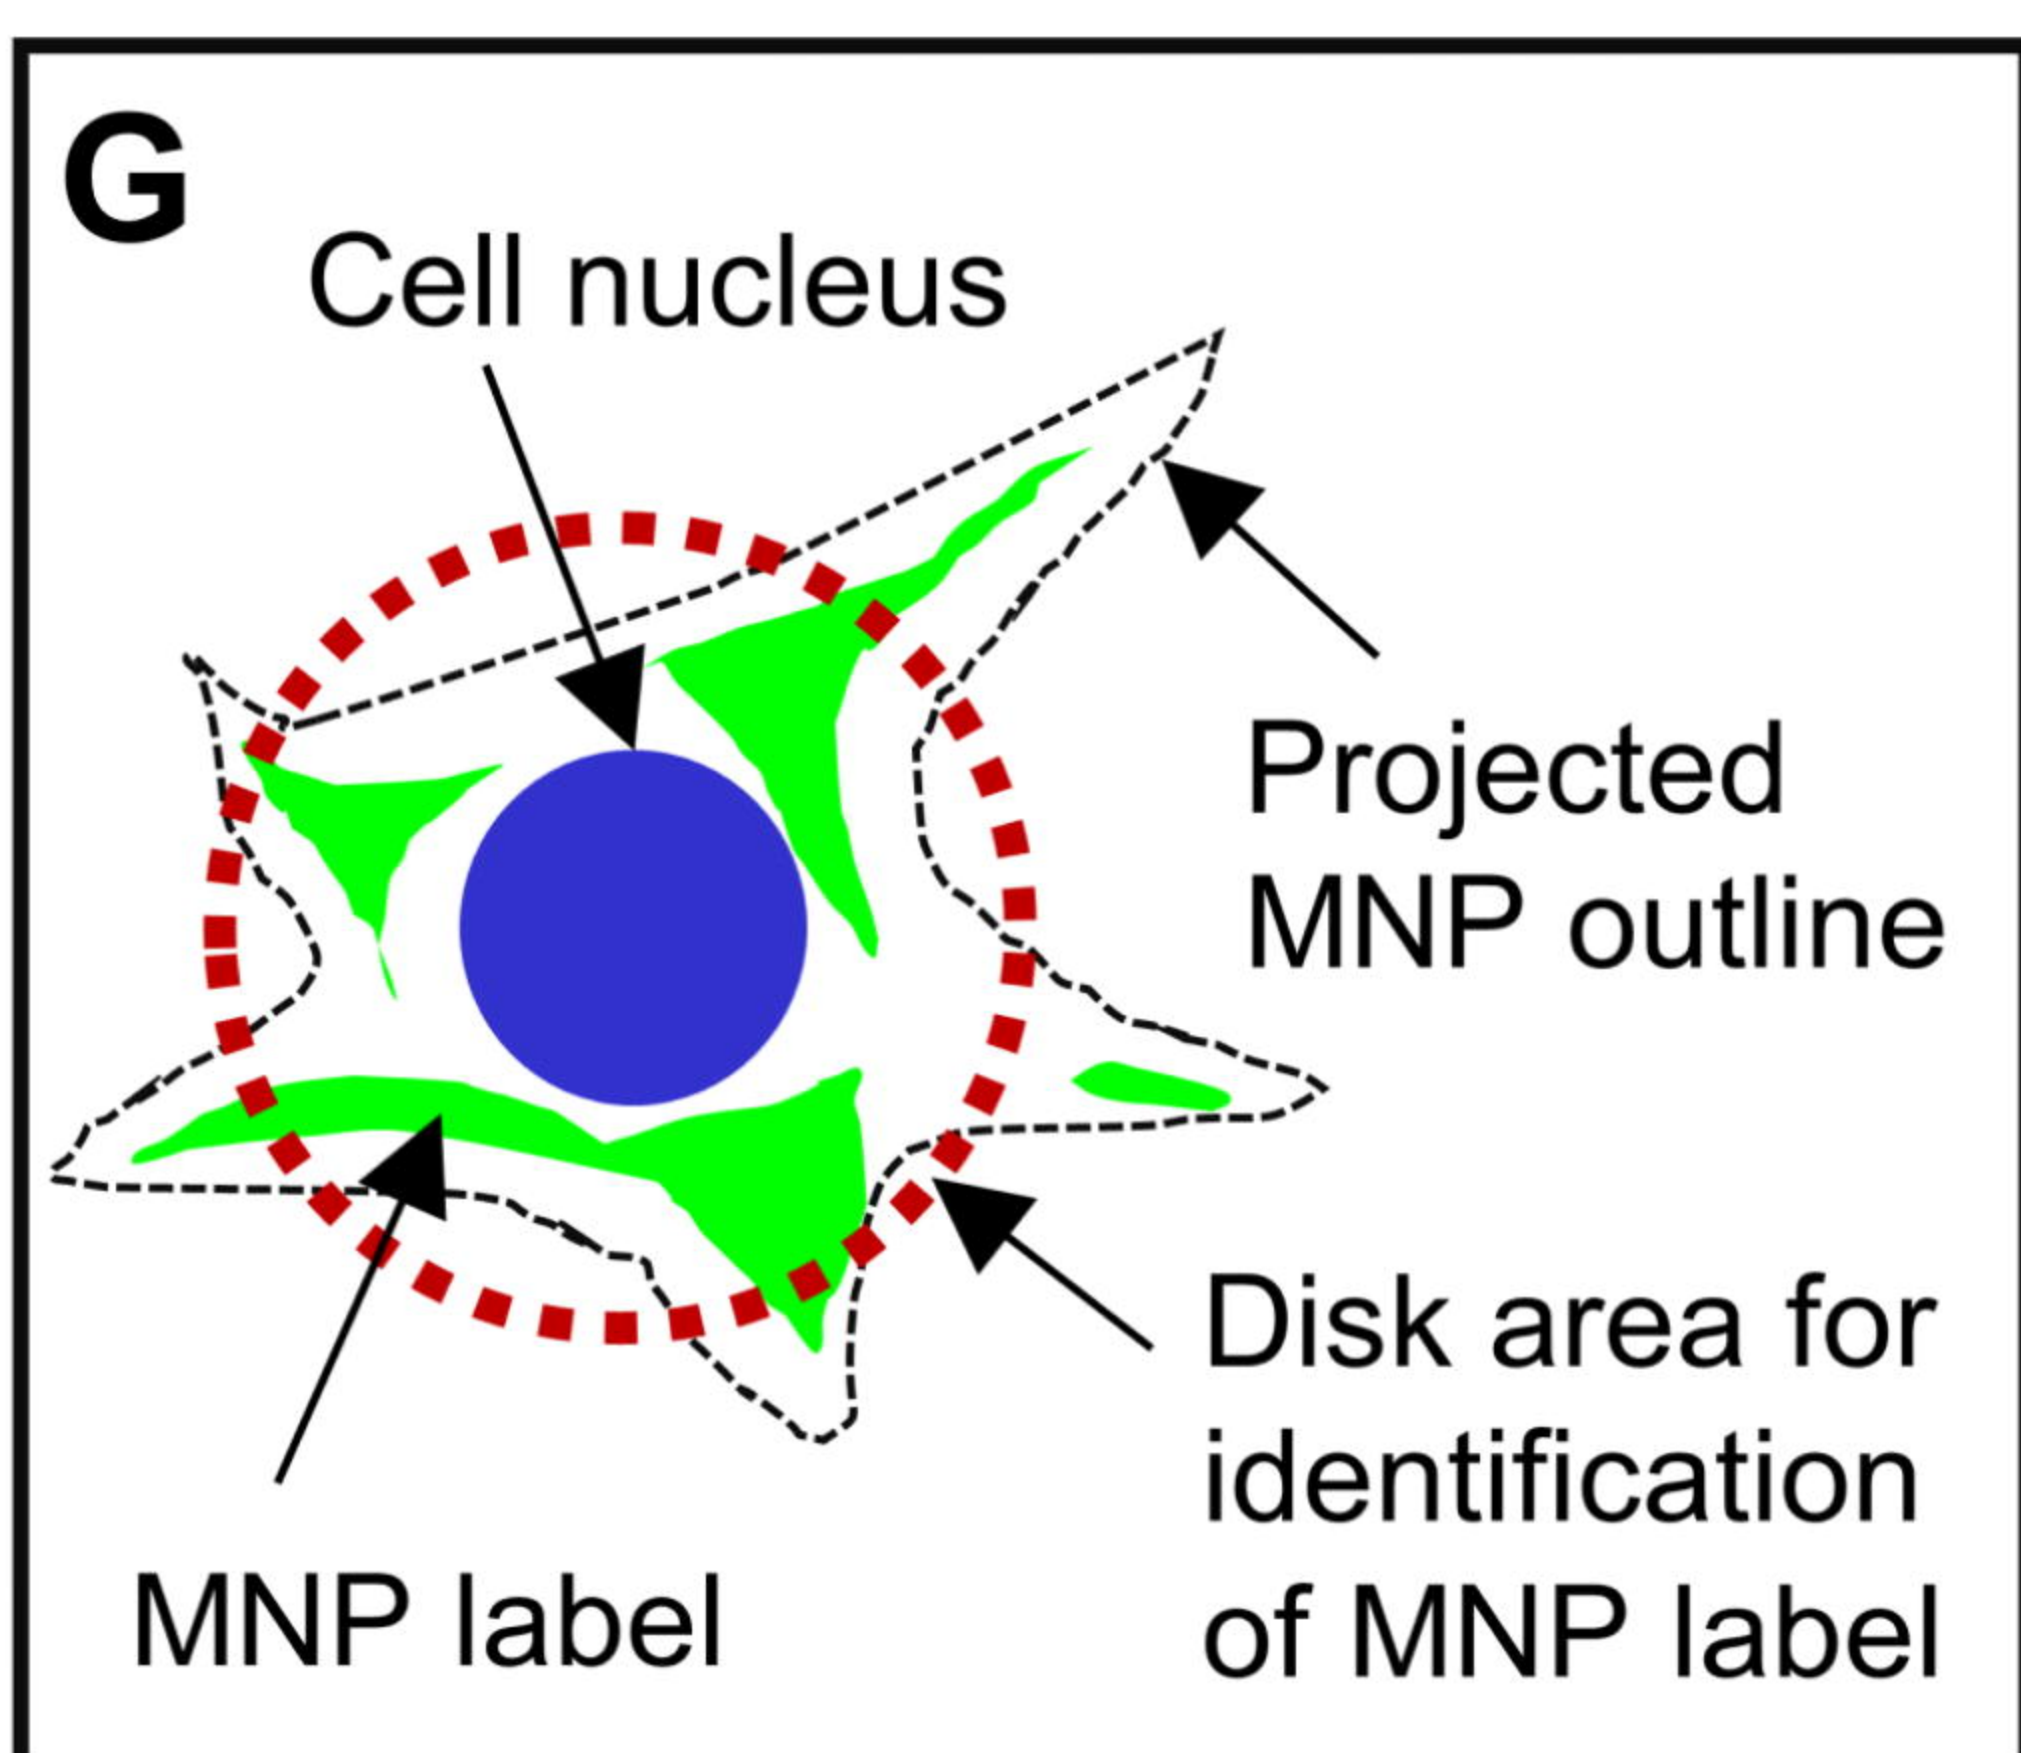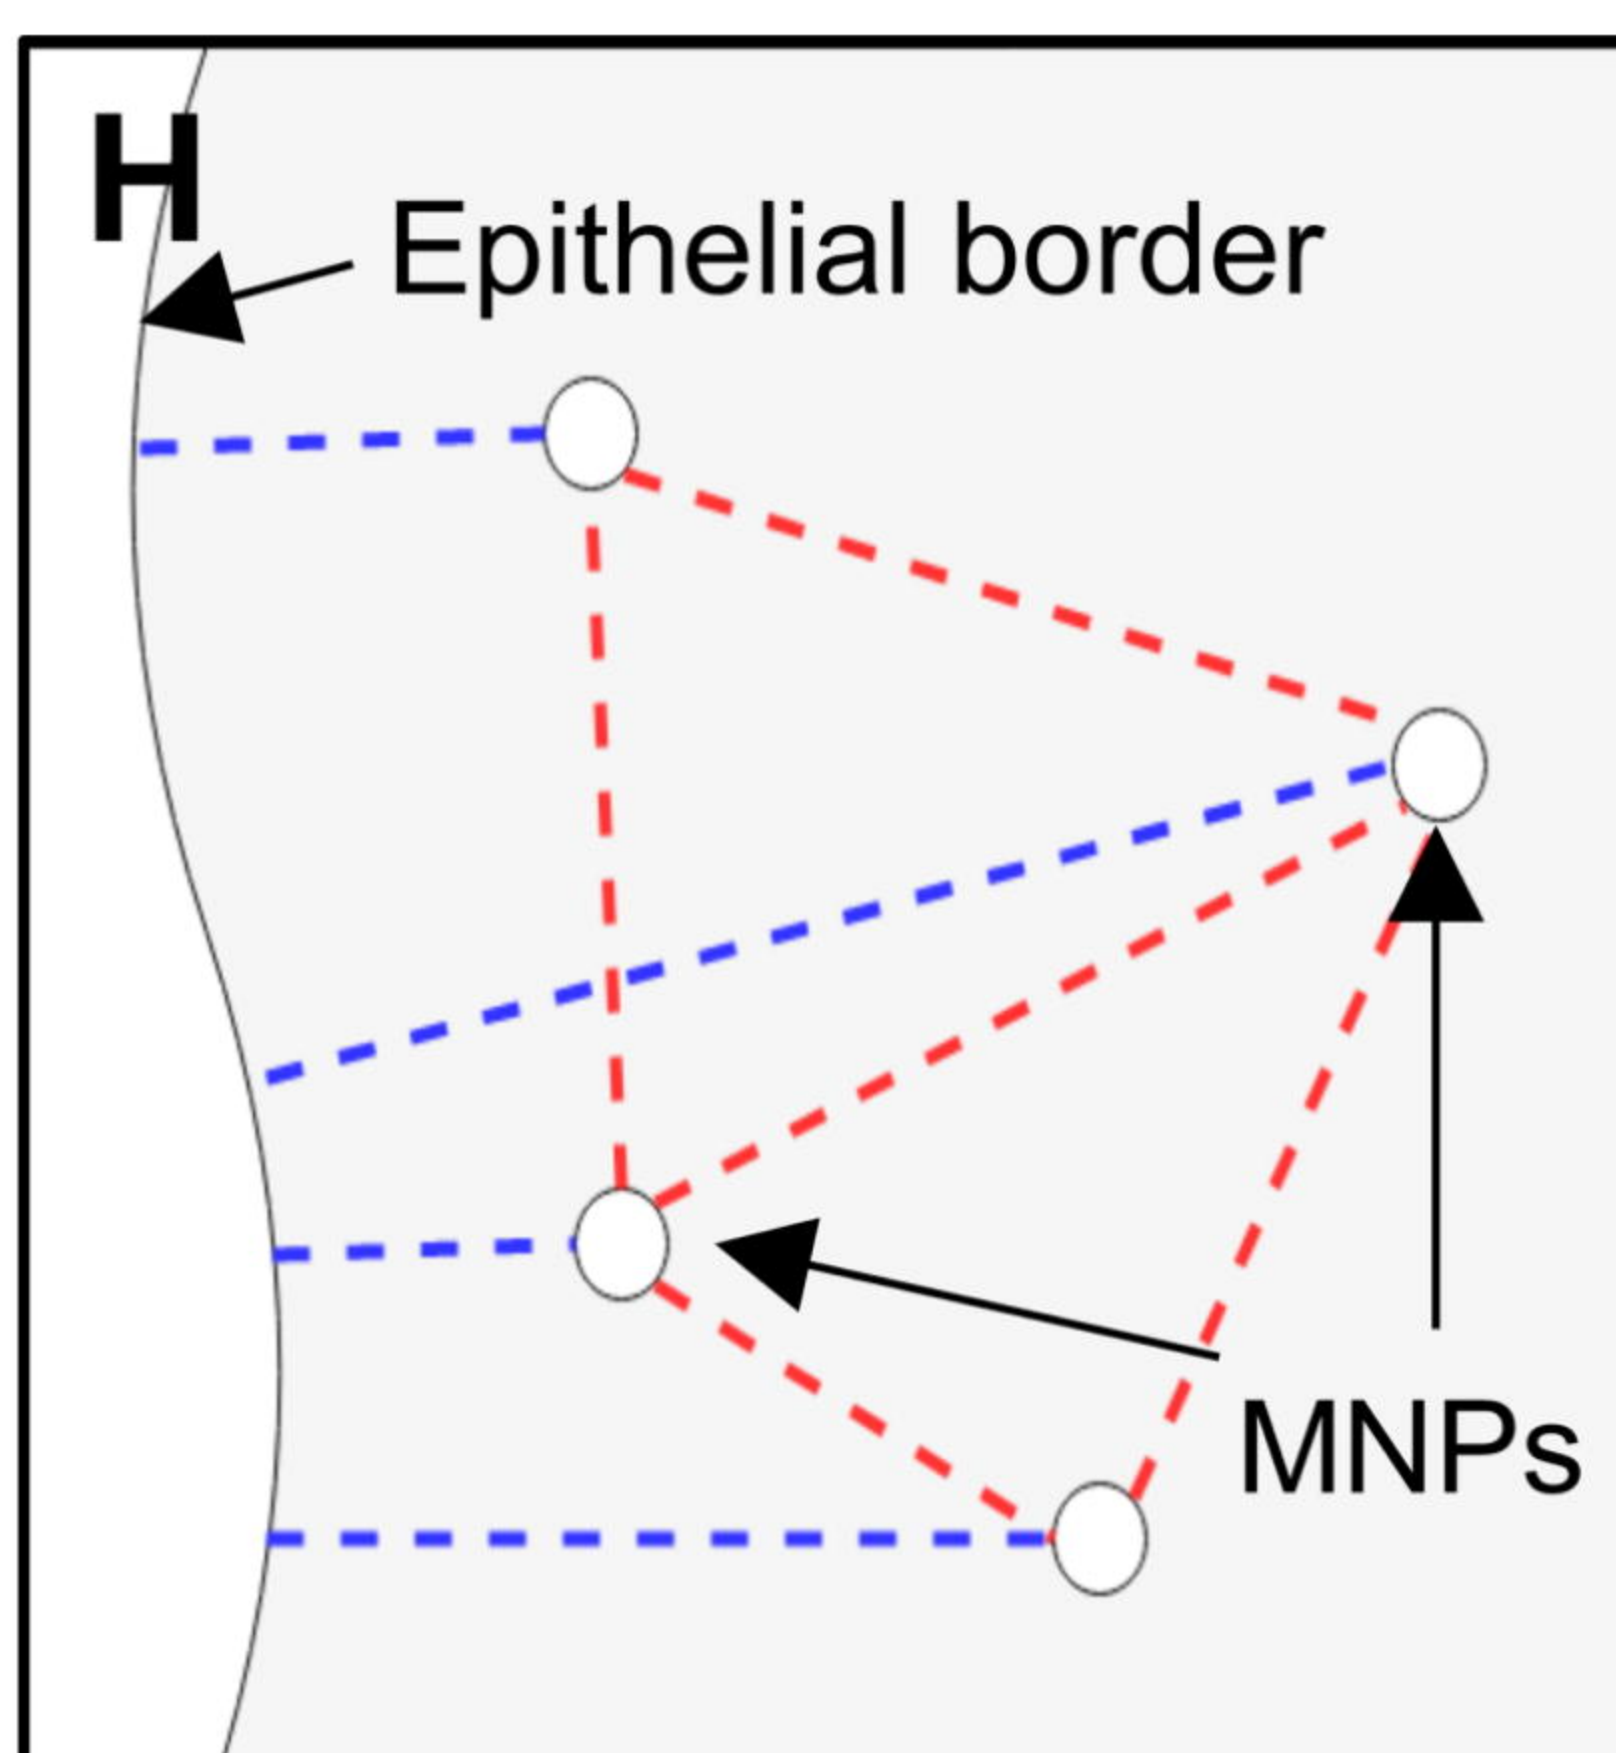

# Figure 2:

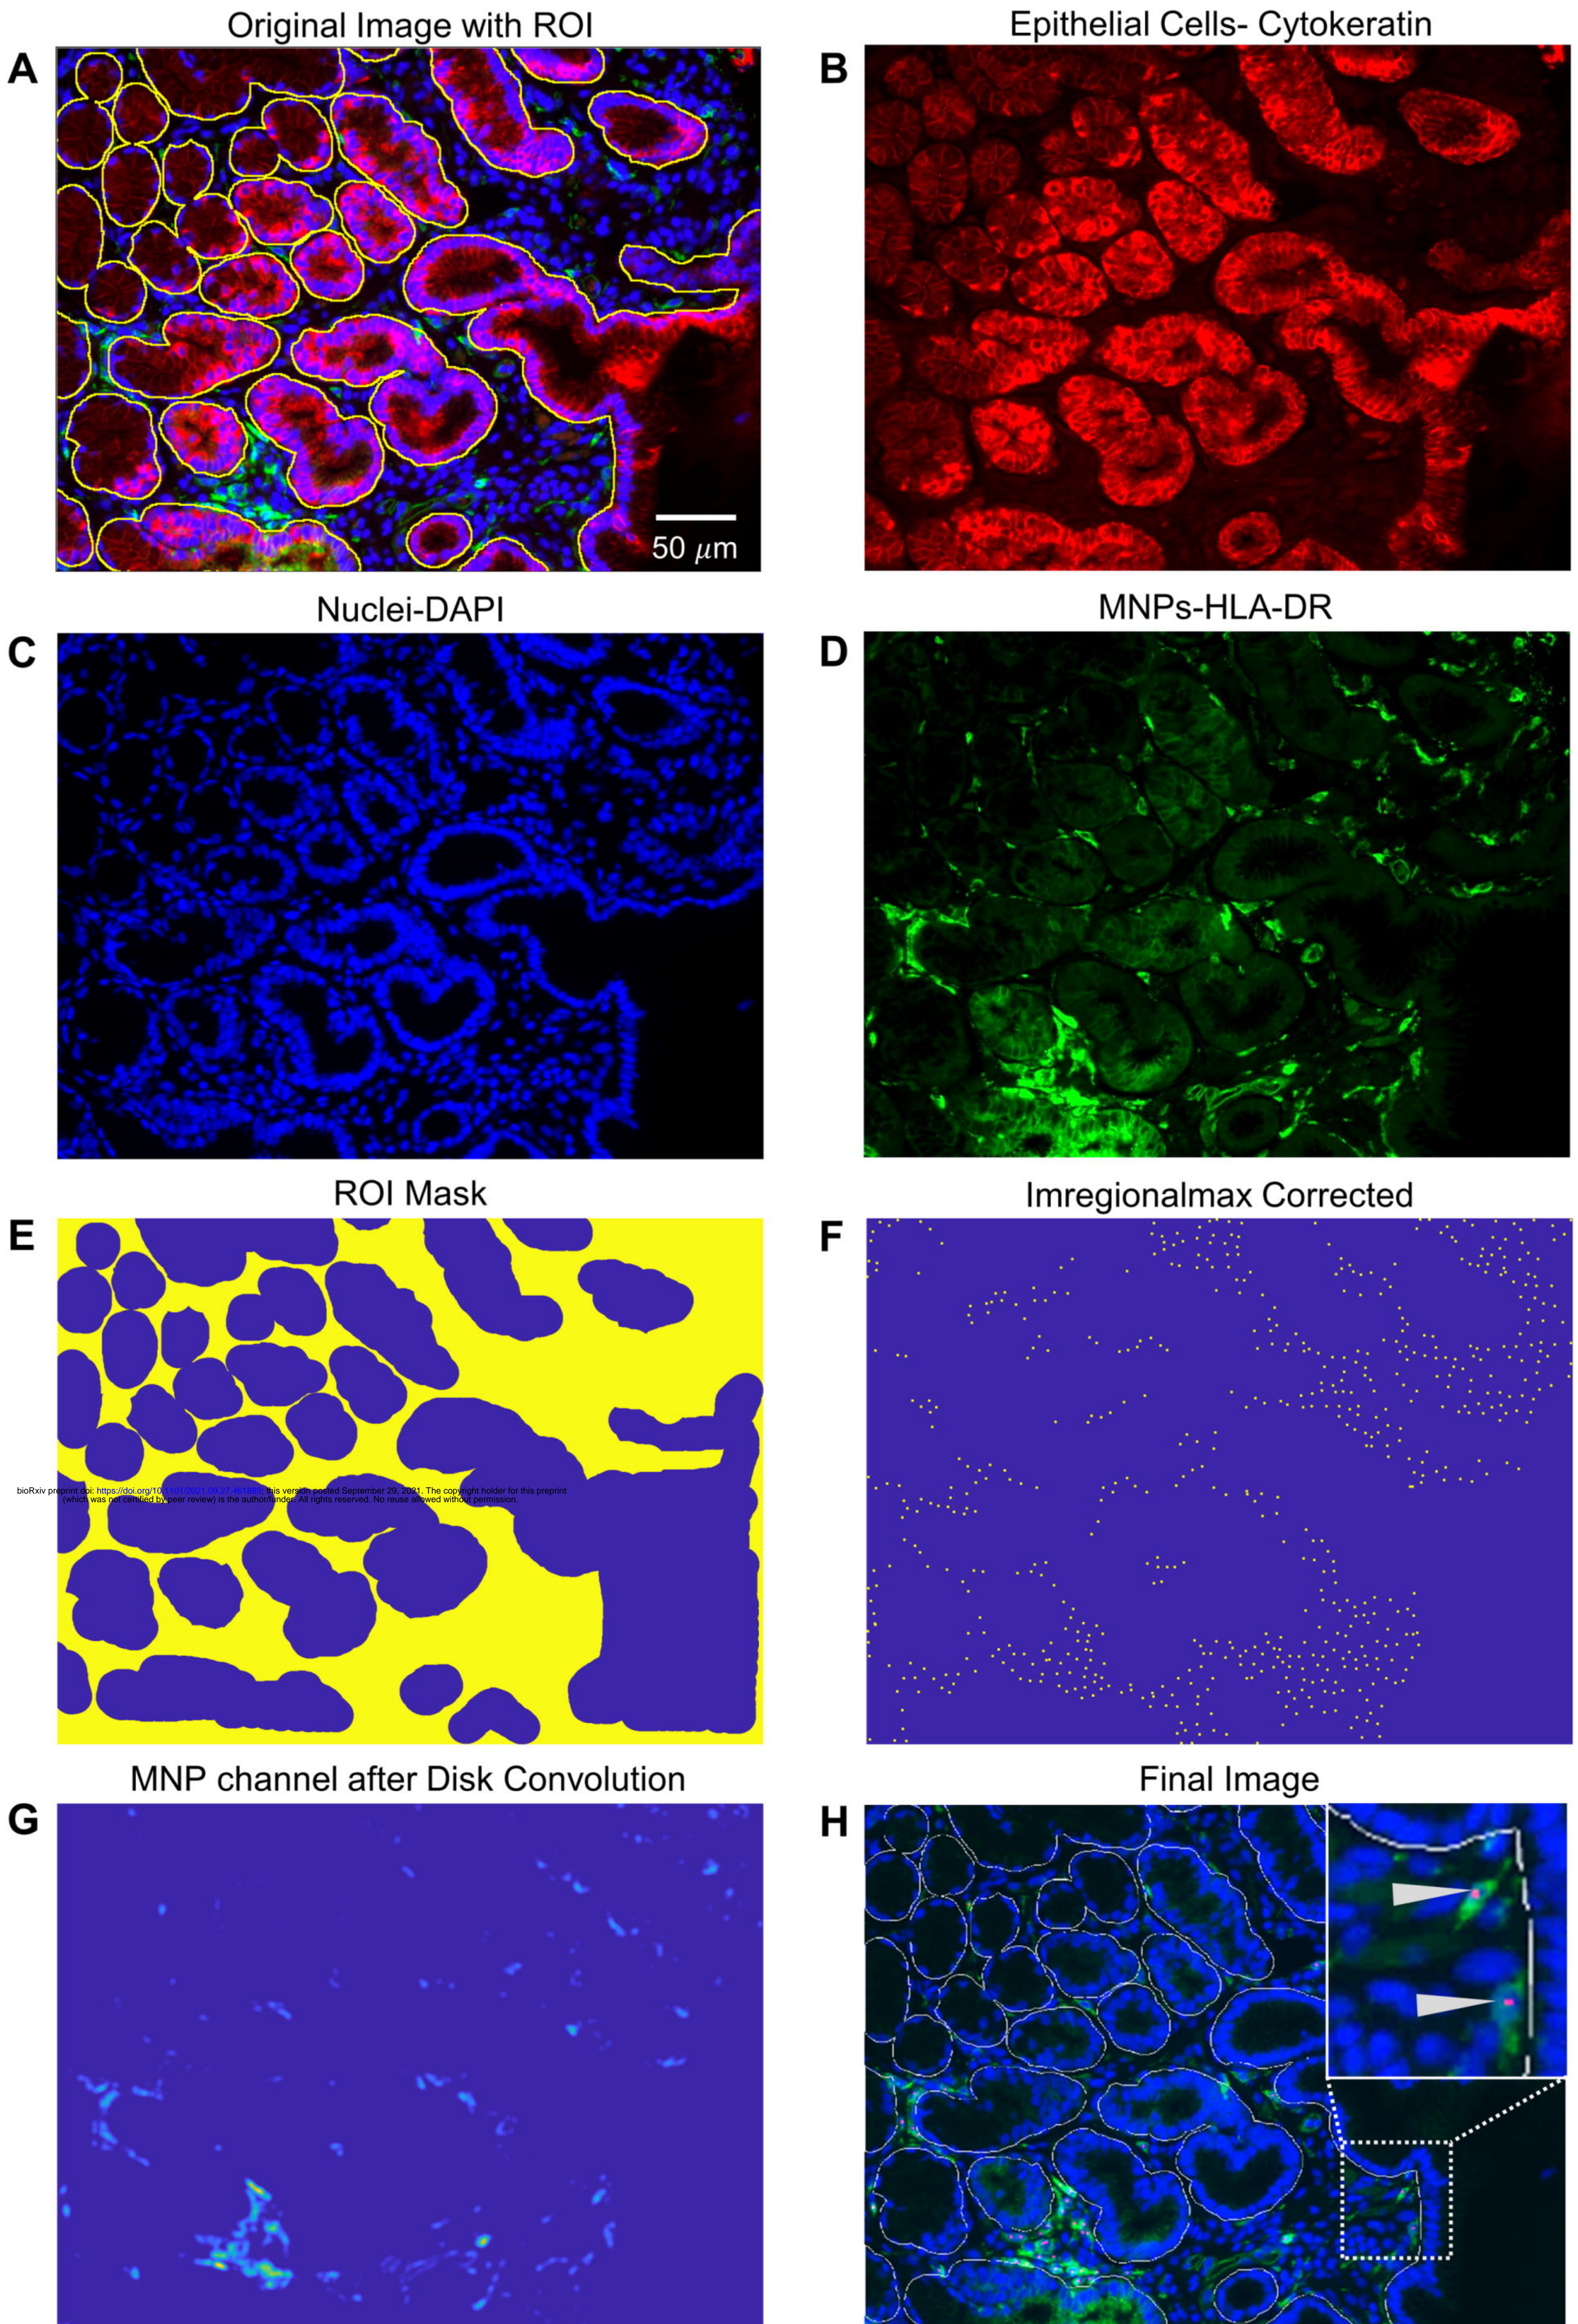

**Figure 3**

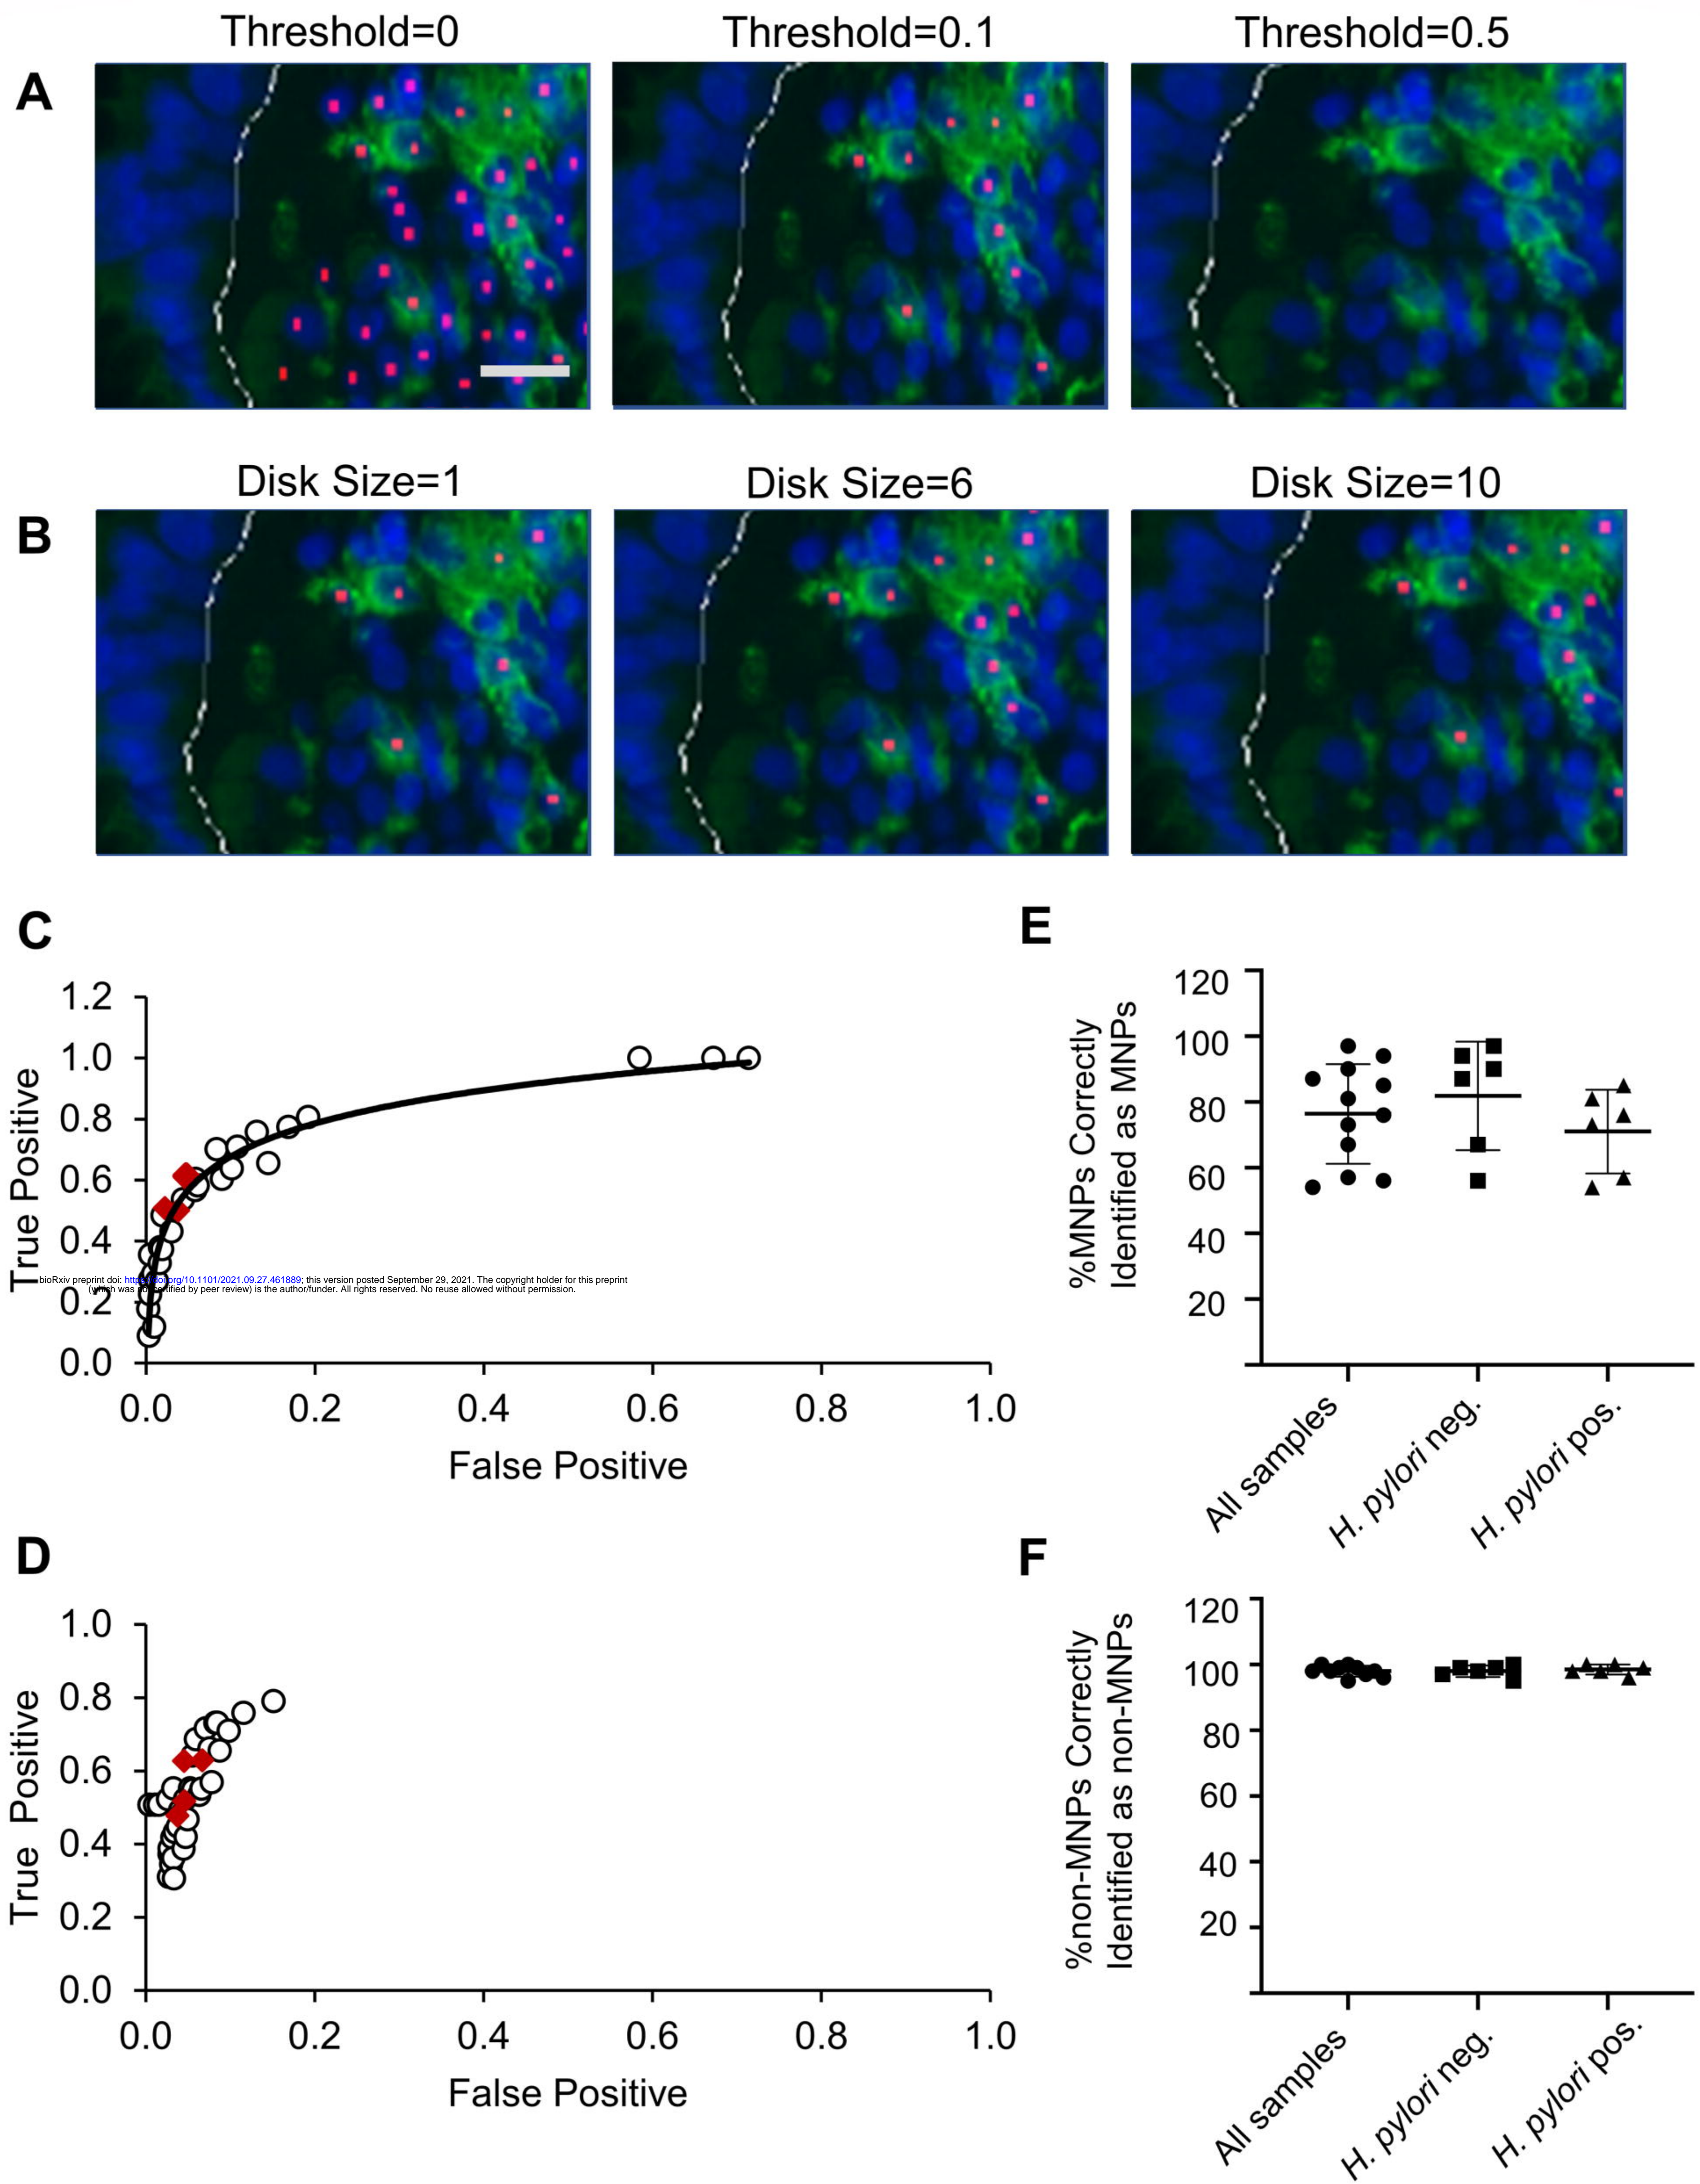

**Figure 4**

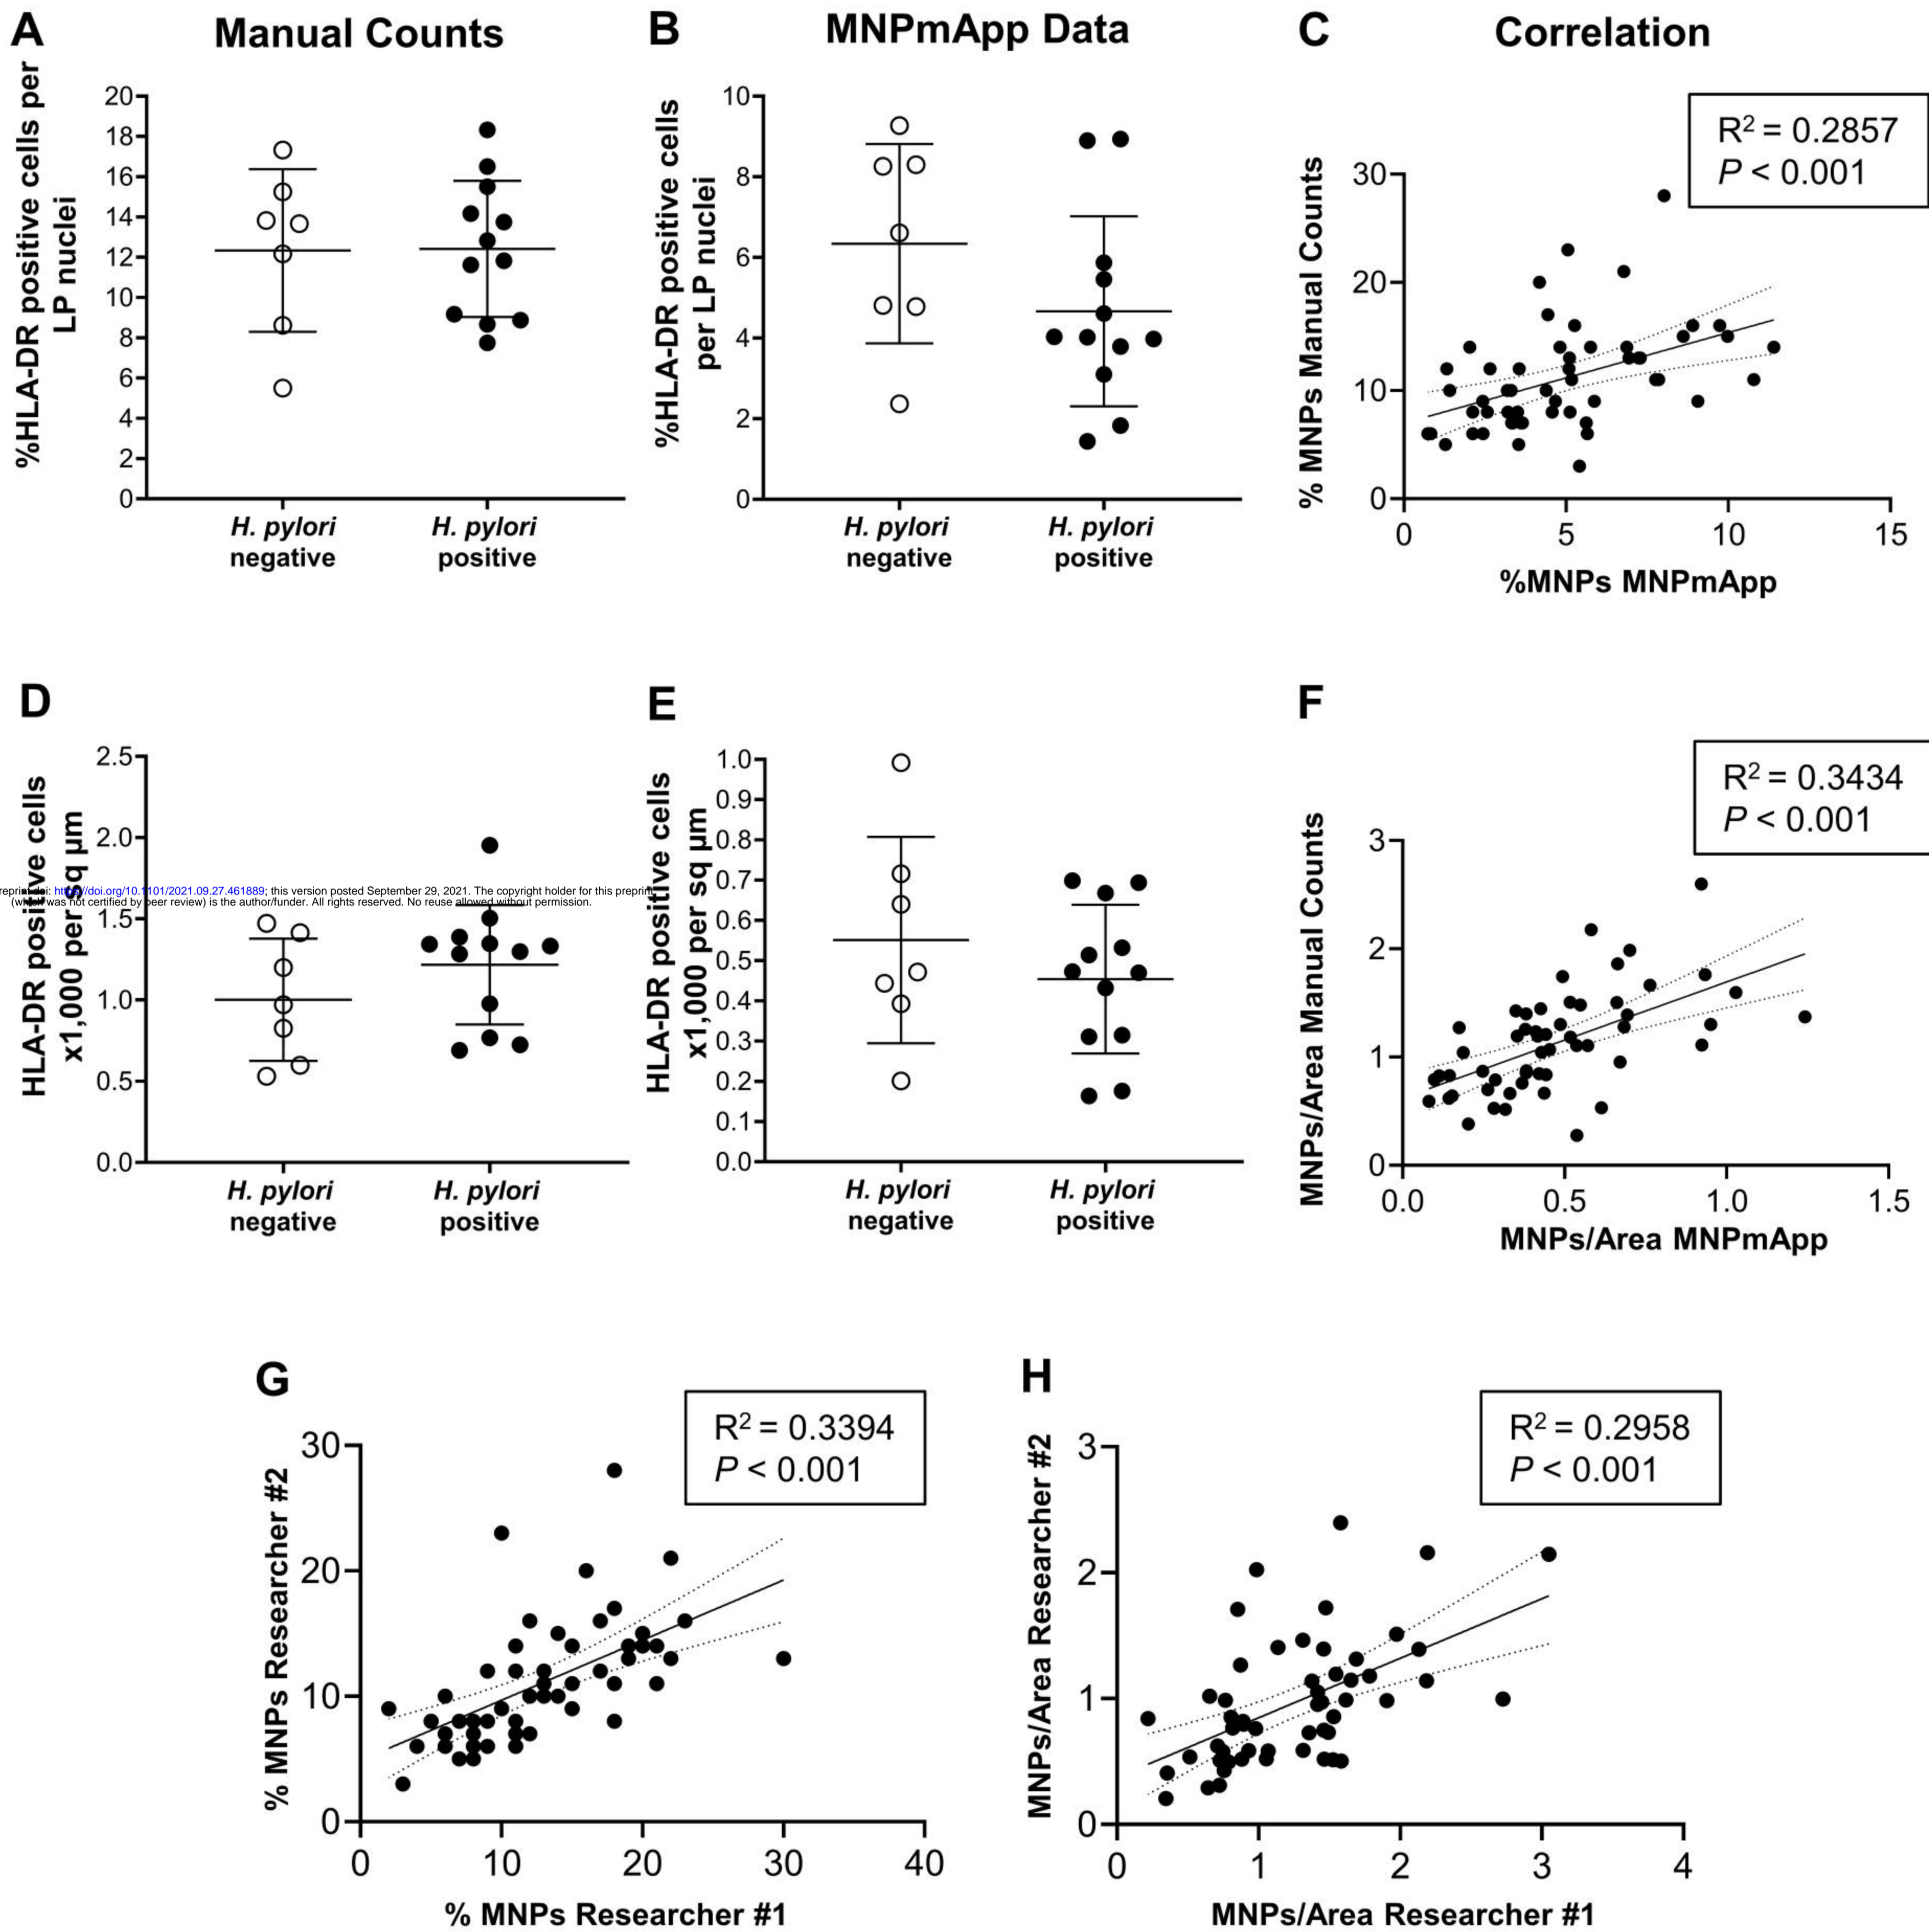

**Figure 5**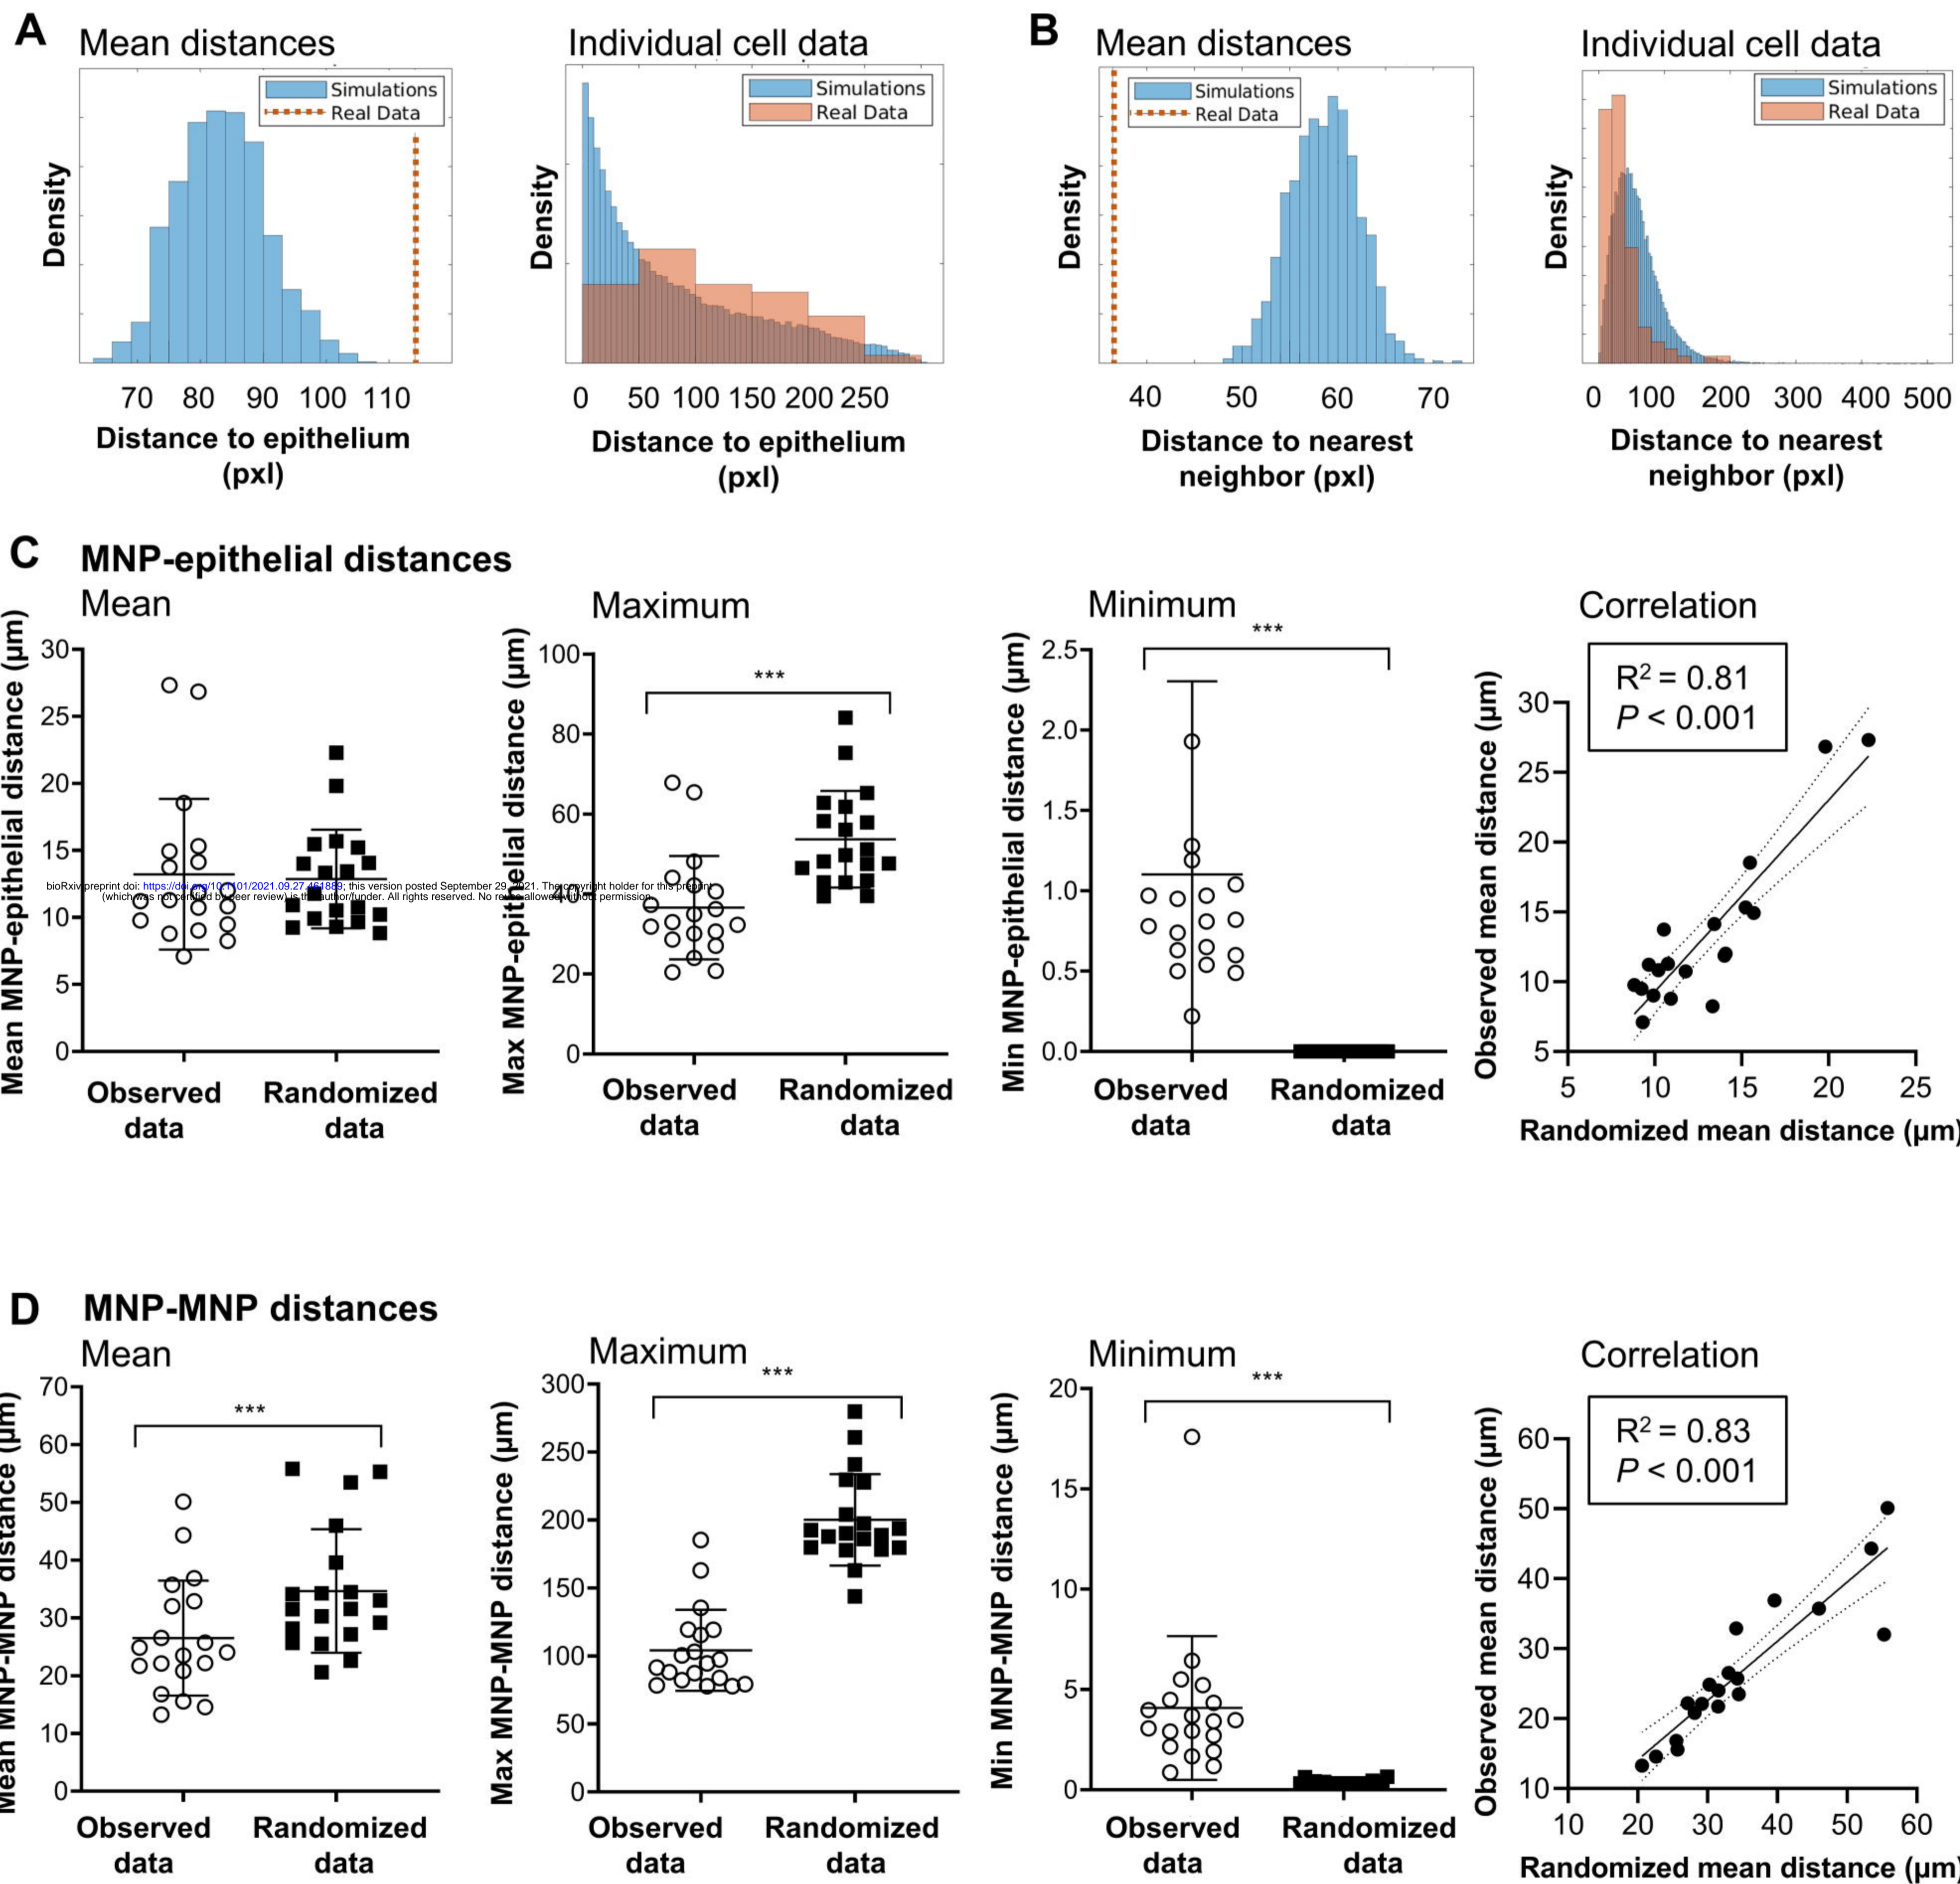

# Figure 6

## A MNP-epithelial distances

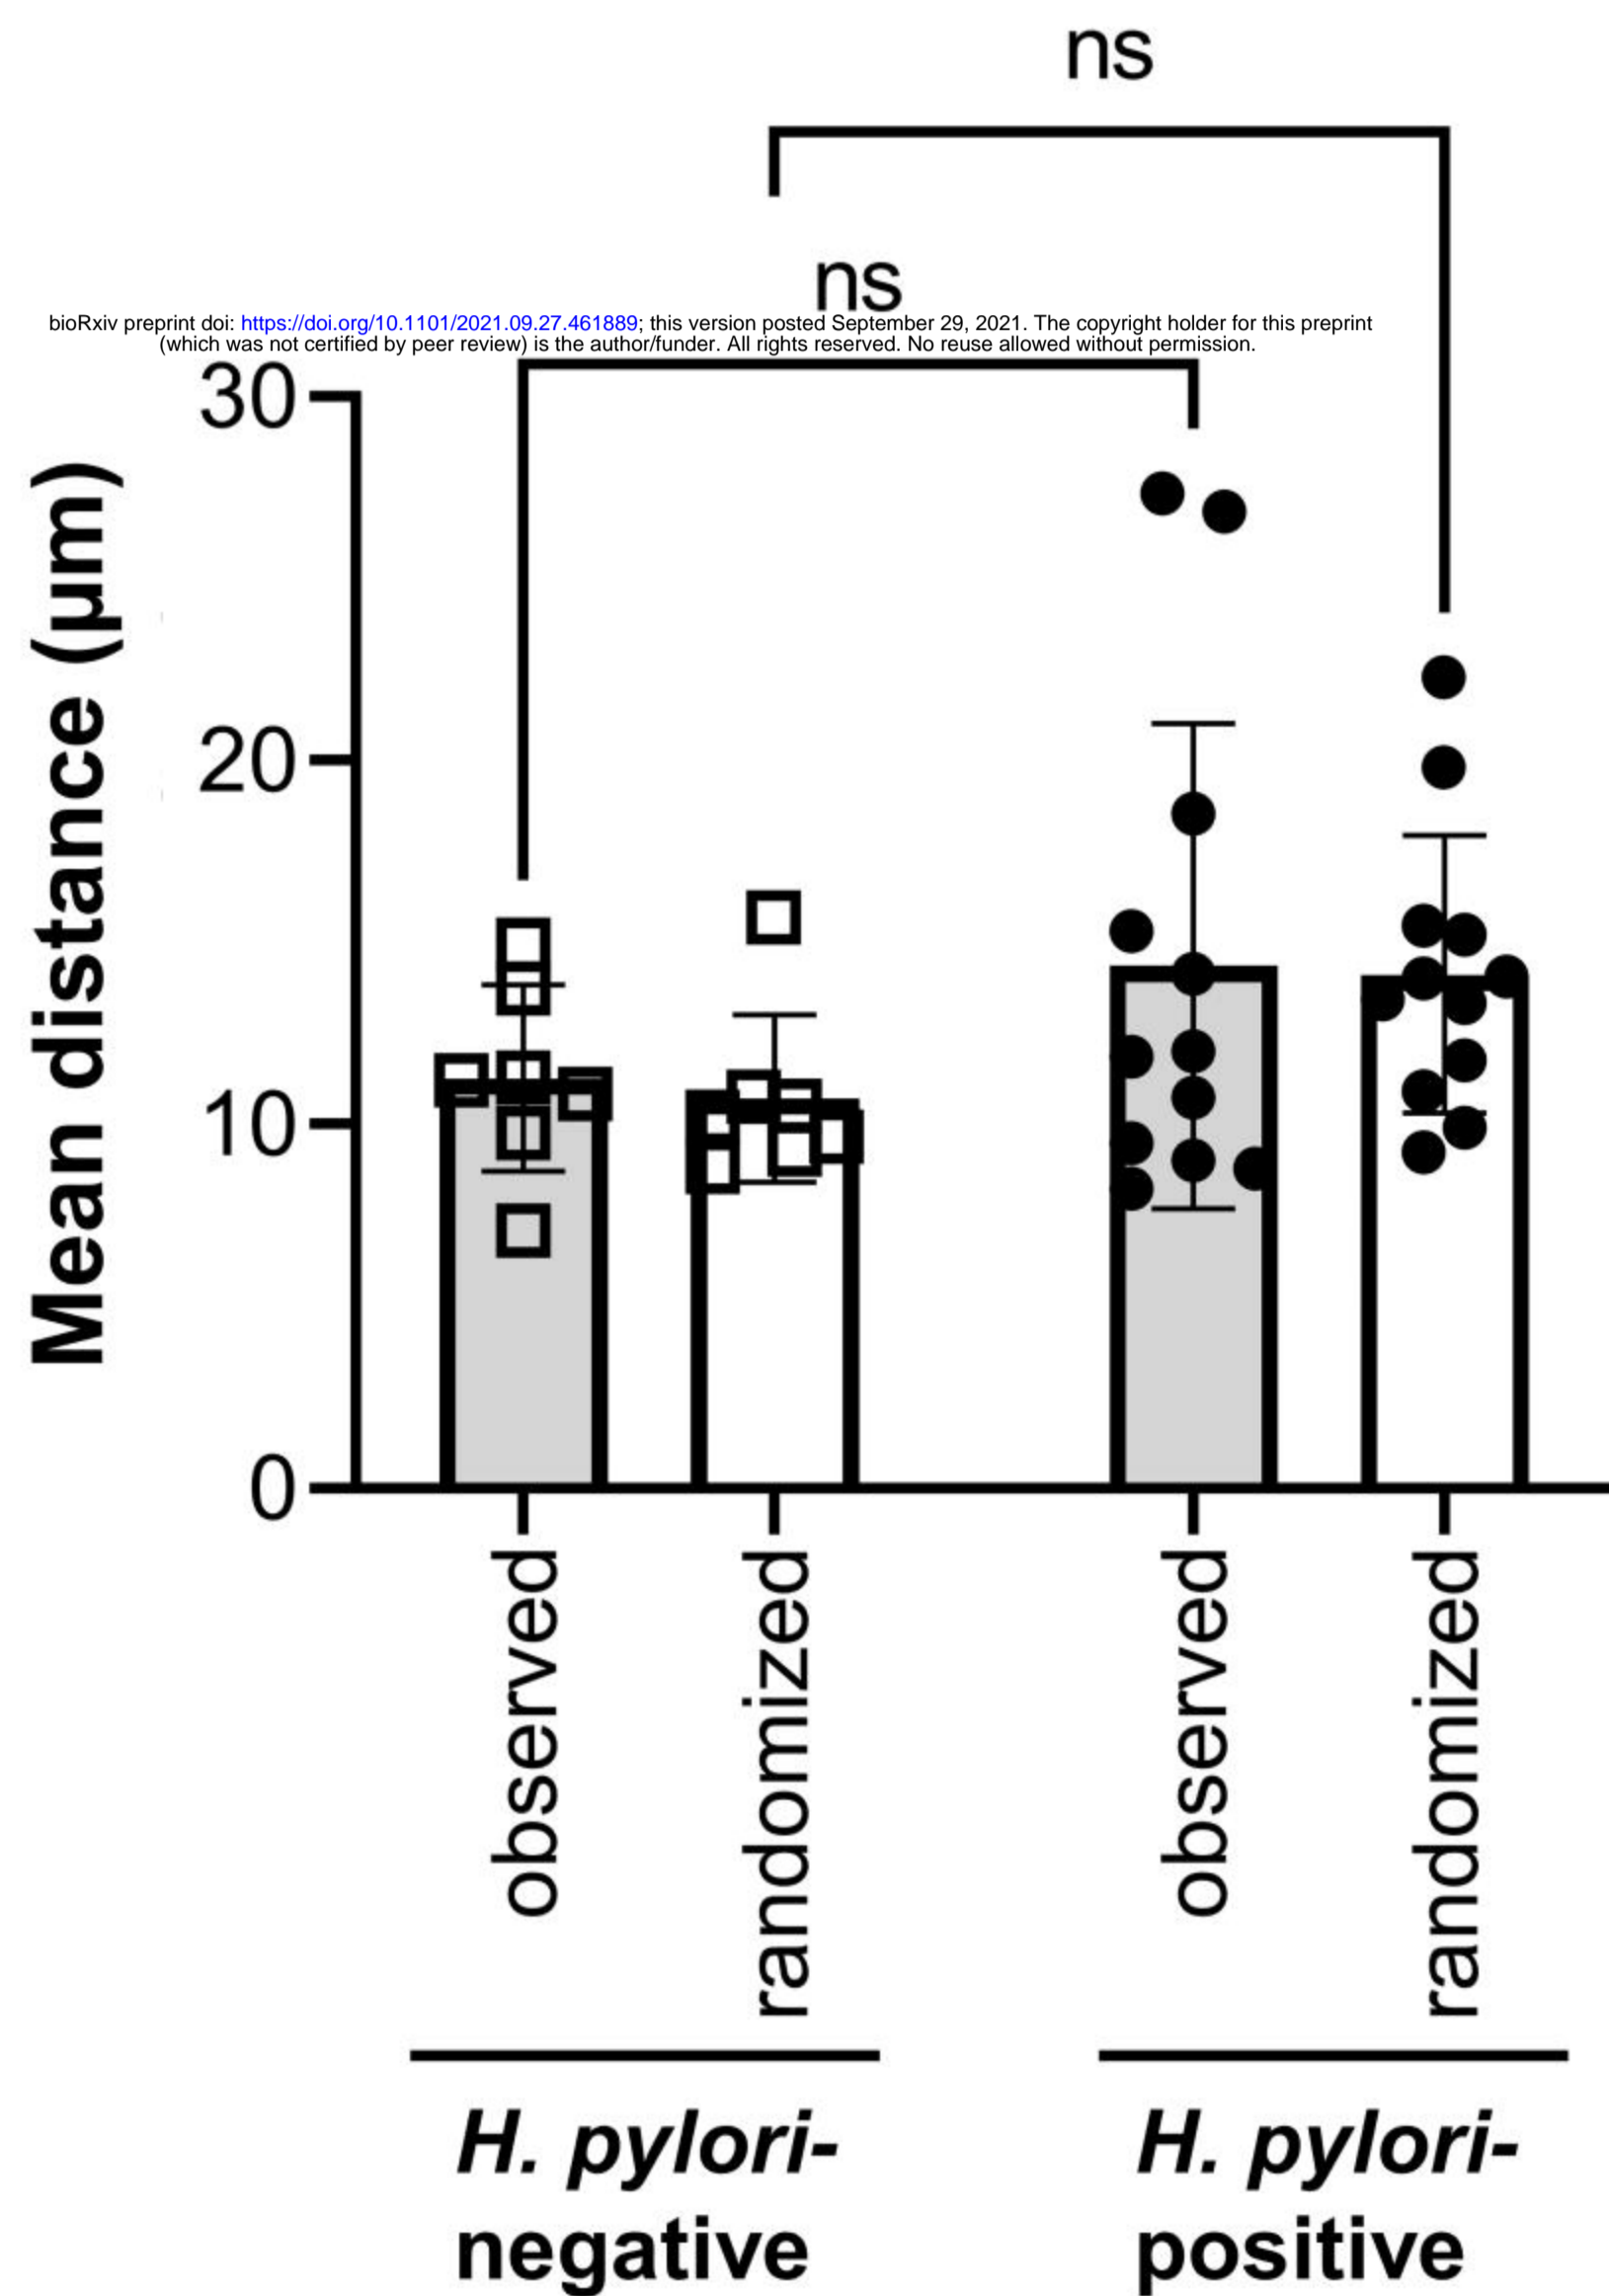

## B MNP-MNP distances

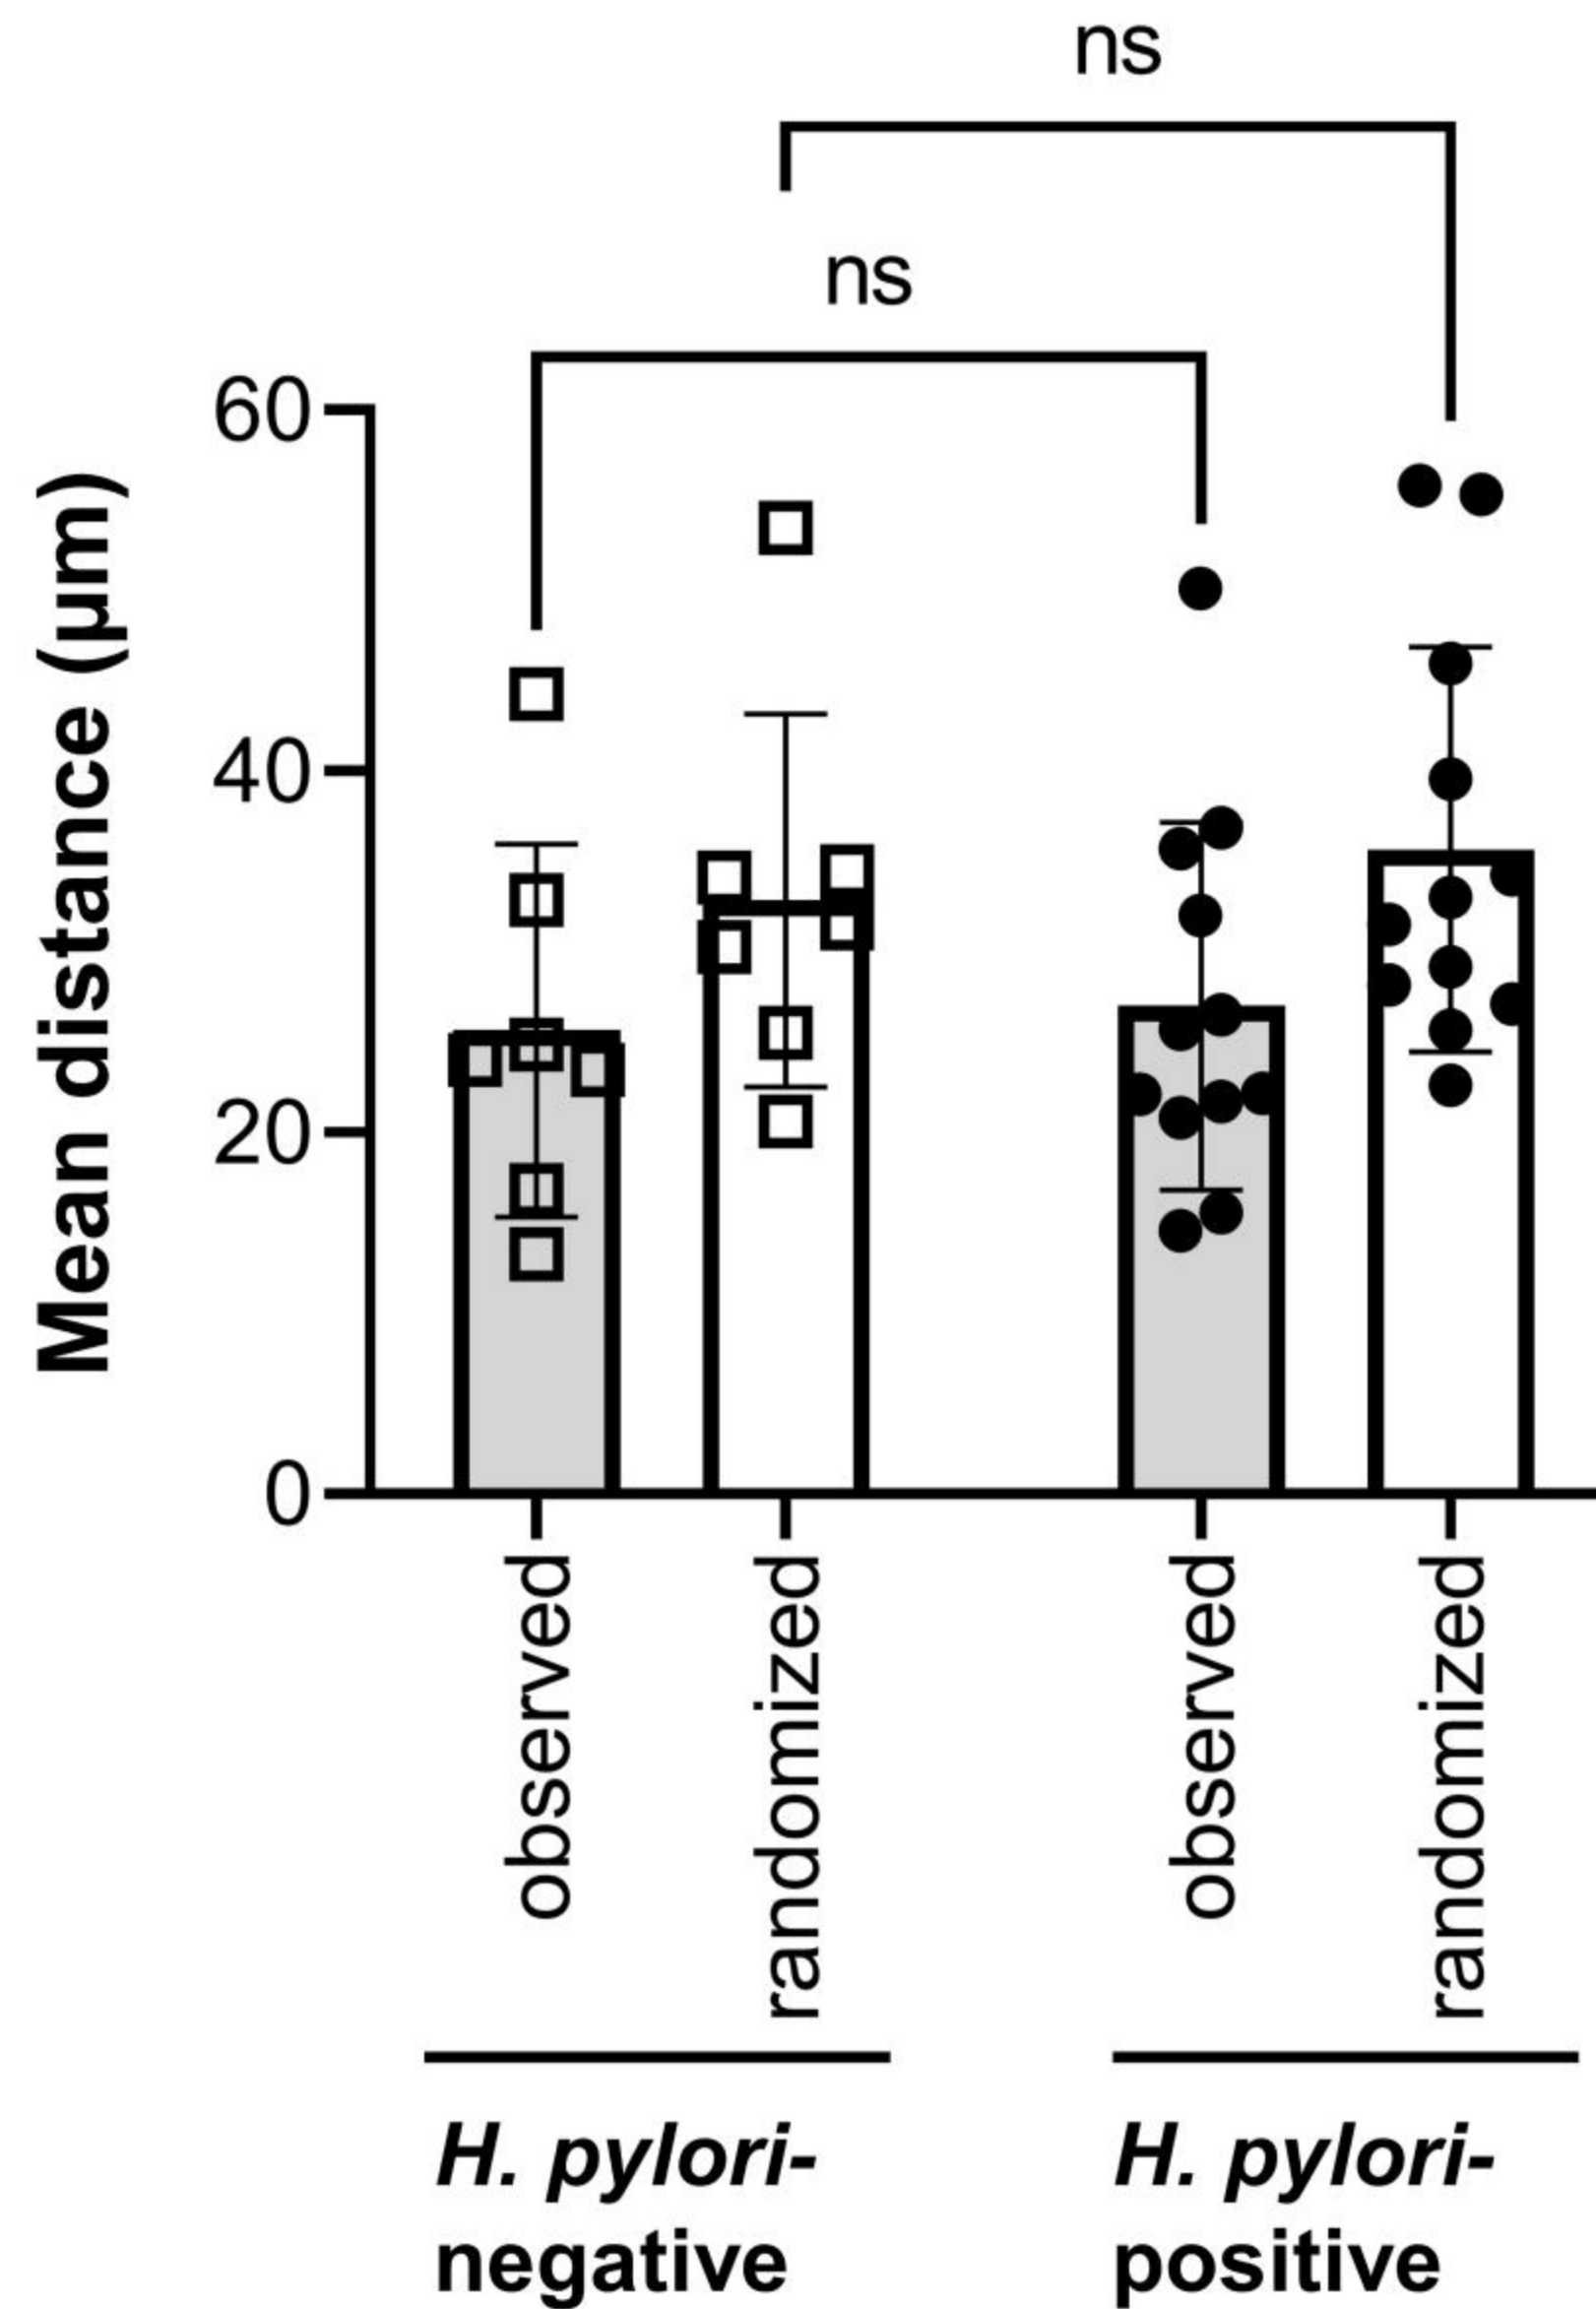

Source: http://biorxiv.org/content/10.1101/2021.09.27.461889v1.full.pdf
